# Supplementary material for: Climate change projected to exacerbate the economic costs of biological invasions
Source: Research Square preprint supplement (doi:10.21203/rs.3.rs-7029011/v1), 2025-07-24
Supplement: Supplementary file 1 [file a3eea21141eeb938faa2a0dd.docx]

**Supplementary Information for**

Climate change projected to exacerbate the economic costs of biological invasions

Shimin Gu1,†, Shengnan Chen2,†, Weishan Tu1,3, Lixia Han1,4, Qing Zhang1,5,6, Yanhua Hong7, Zhiqiang Lin8, Yuanbao Du1, Wenbo Liao2,*, and Xuan Liu1,6,*

1 Sate Key Laboratory of Animal Biodiversity Conservation and Integrated Pest Management, Institute of Zoology, Chinese Academy of Sciences, Beijing, 100101, China

2 Key Laboratory of Southwest China Wildlife Resources Conservation (Ministry of Education), China West Normal University, Nanchong, 637009, China

3 School of Life Sciences, Division of Life Sciences and Medicine, University of Science and Technology of China, Hefei, 230026, China

4 Huazhong Agricultural University, Wuhan, 430000, China

5 Laboratory of Island Biogeography and Conservation Biology, College of Life Sciences, Nanjing Normal University, Nanjing, 210023, China

6 University of Chinese Academy of Sciences, Beijing, 100049, China

7 Key Laboratory for Conserving Wildlife with Small Populations in Yunnan, Southwest Forestry University, Kunming, 650224, China

8 College of Life Sciences, Shihezi University, Shihezi, 832003, China

†S.G. and S.C. contribute equally to this work

*To whom correspondence may be addressed. Email: liuxuan@ioz.ac.cn; liaobo_0_0@126.com

Correspond Authors: Xuan Liu, Wenbo Liao

Email: [liuxuan@ioz.ac.cn](mailto:liuxuan@ioz.ac.cn), [liaobo_0_0@126.com](mailto:liaobo_0_0@126.com)

**This file includes:**

Supplementary Fig. 1 to Fig. 14

Supplementary Table 1 to Table 7

Legends for Supplementary Data 1 to Data 10

Supplementary References

**
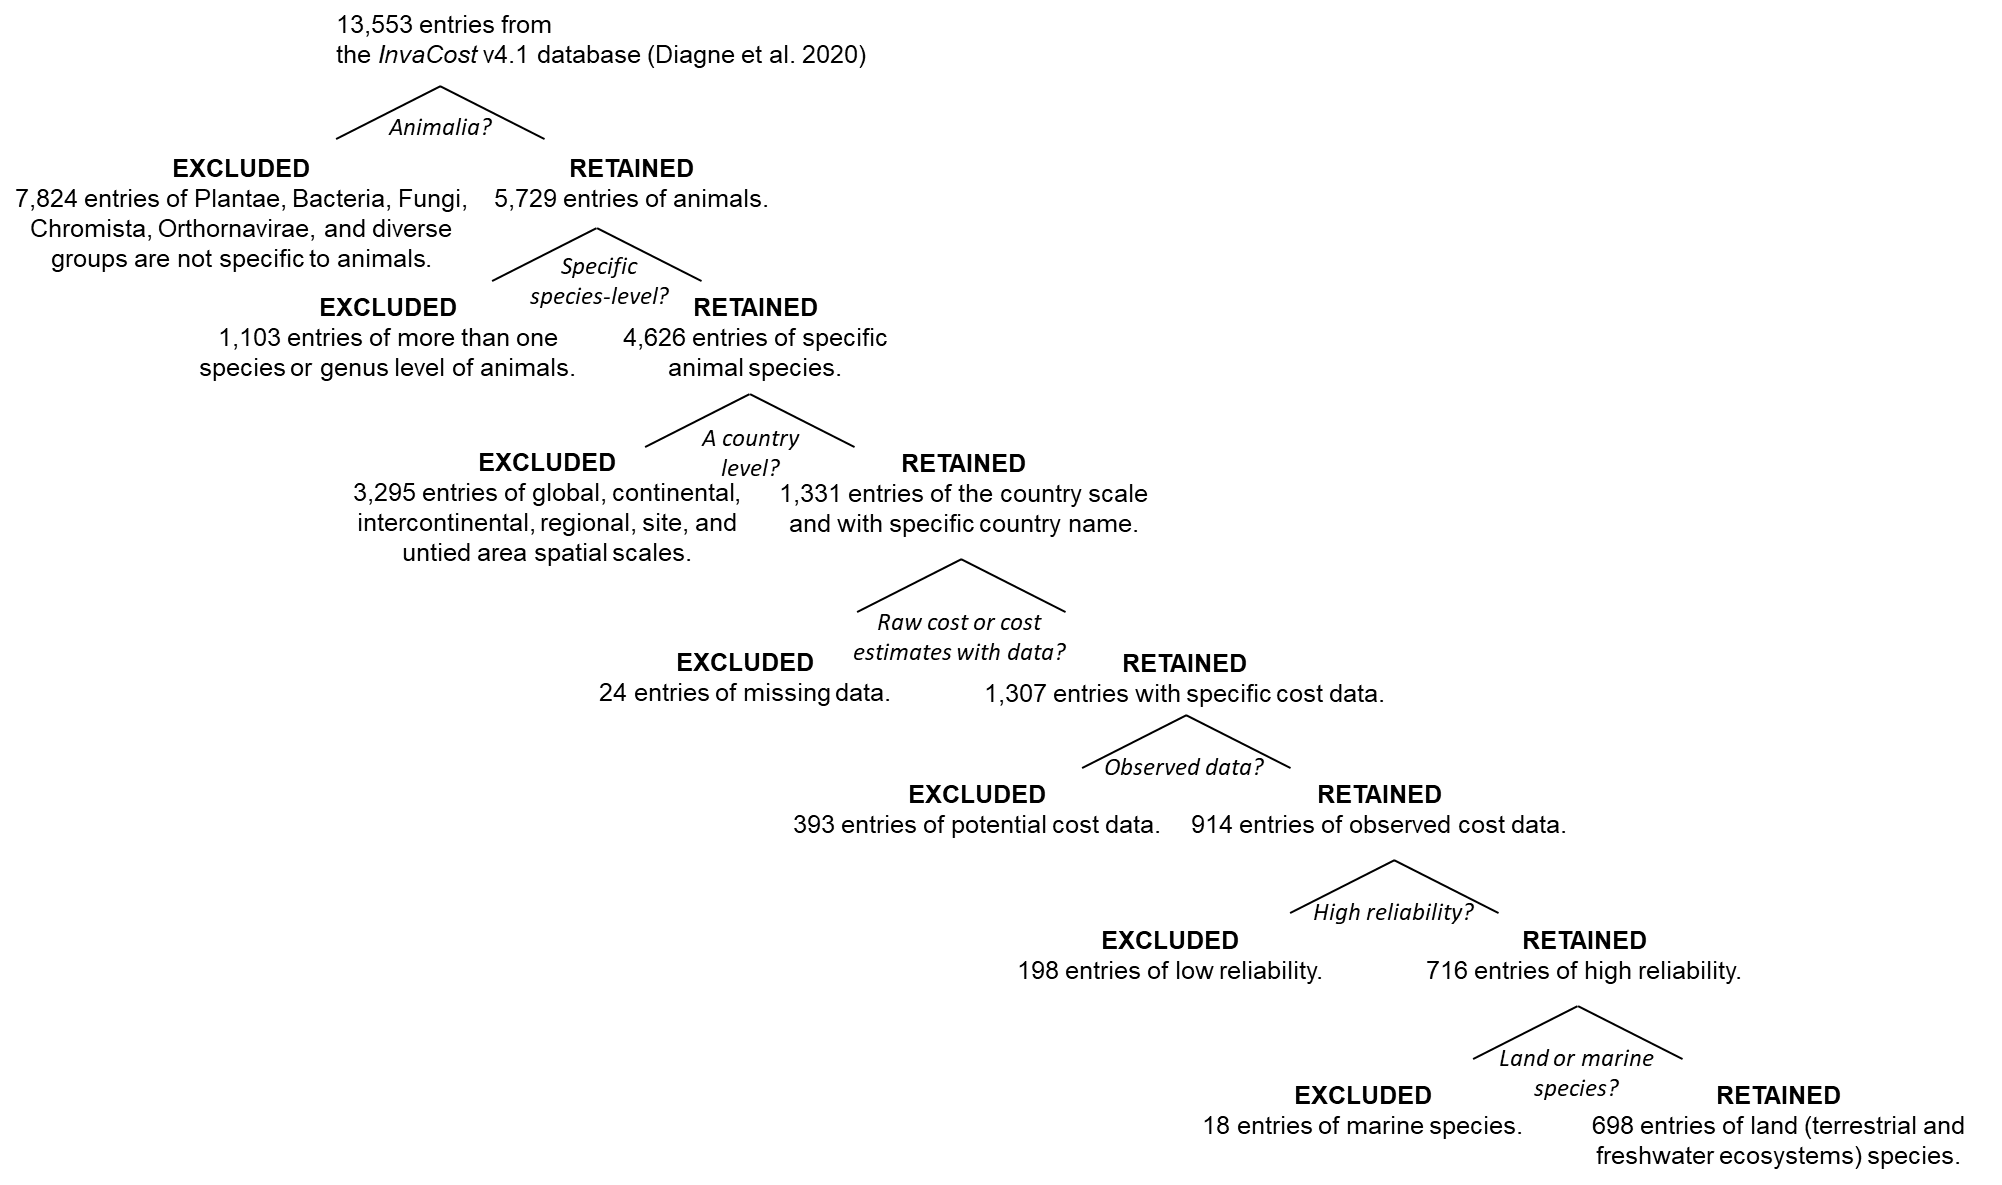
**

Supplementary Fig. 1 | Flow diagram showing filtering steps from the original *InvaCost* v4.1 database 1 to the target sub-dataset of analyses.

**
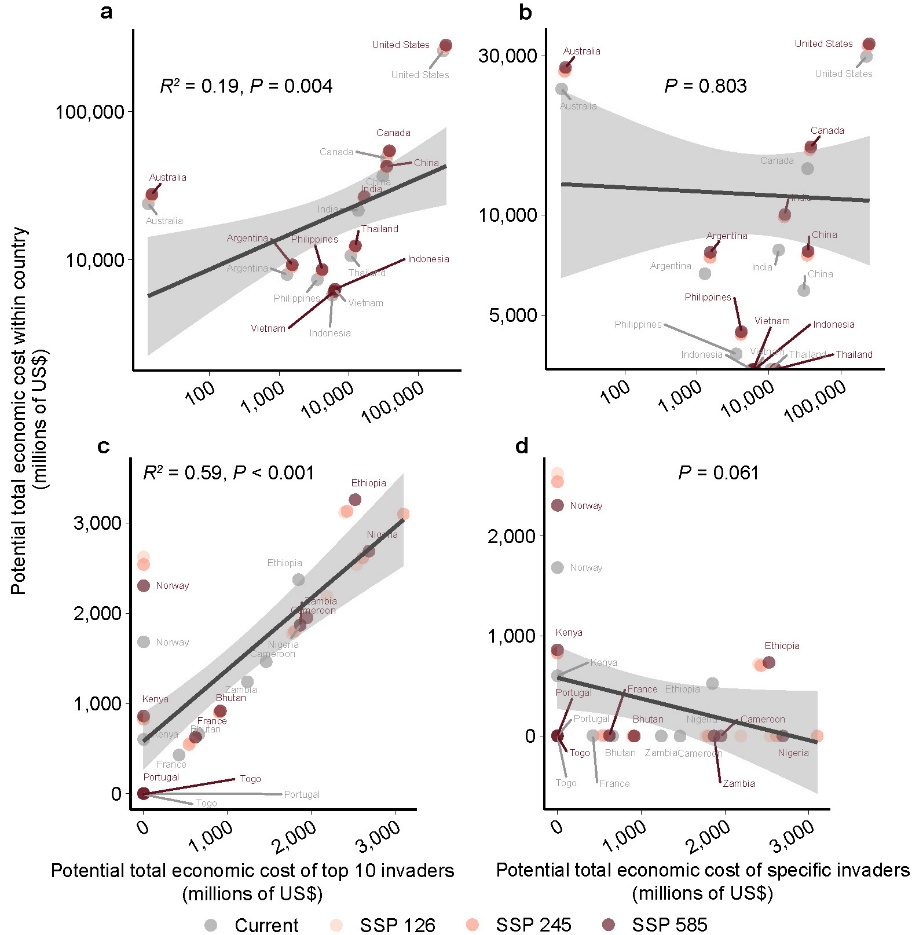
**

Supplementary Fig. 2 | Relationships of country’s total potential economic costs with the potential economic costs of those global top 10 costliest invaders (a and c) and those country-specific invaders (b and d). (a) and (b) show the relationship for the top ten costliest countries, and (c) and (d) show the relationship for the countries with great increase of potential costs.

**
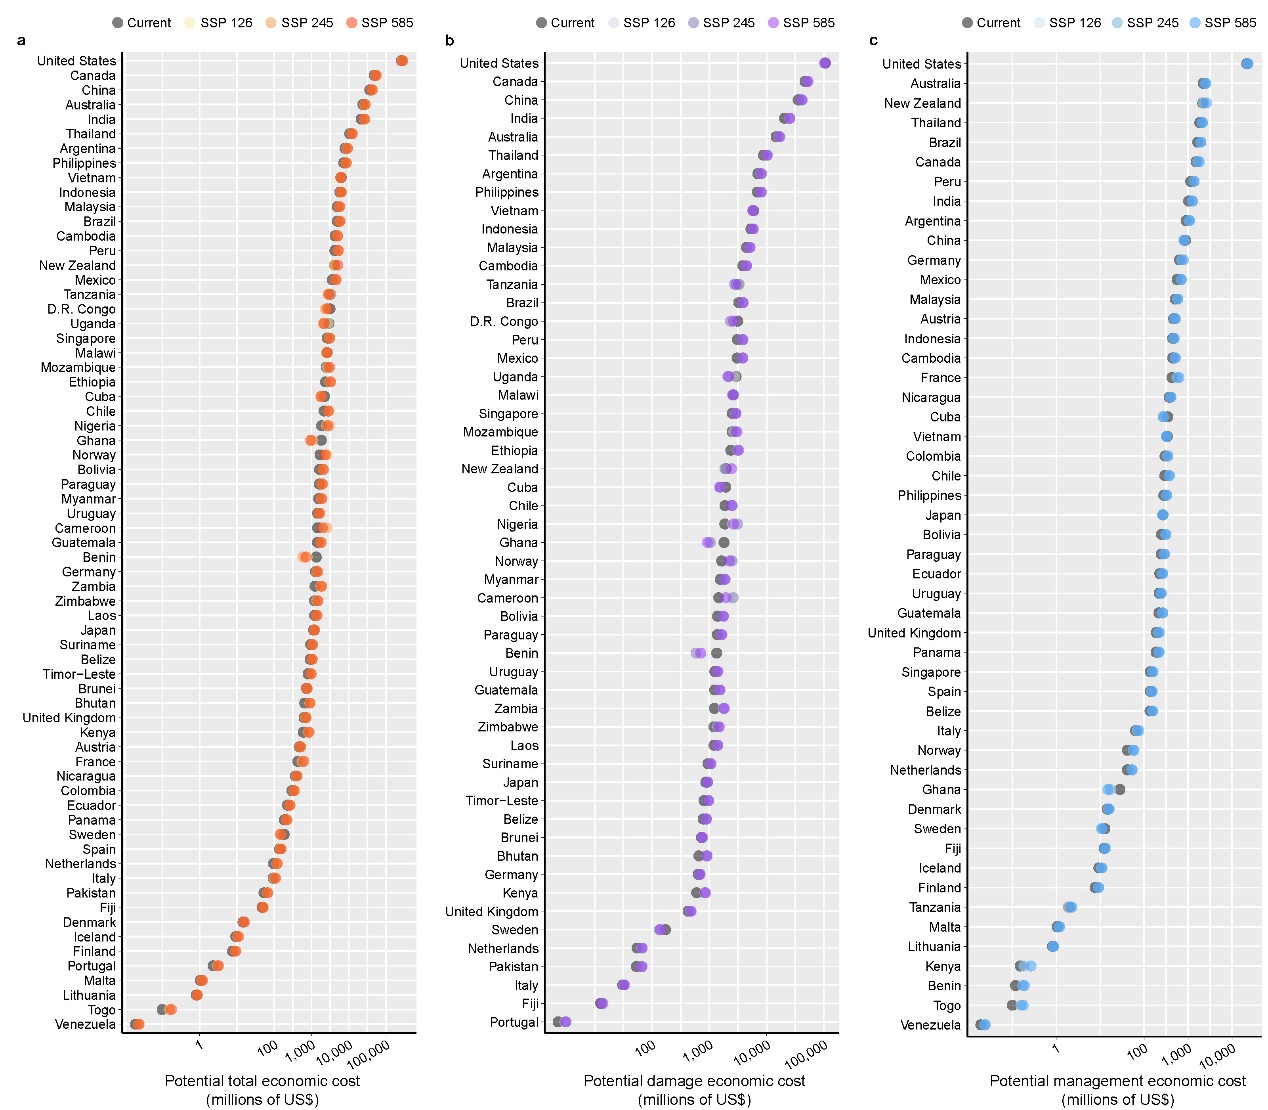
**

Supplementary Fig. 3 | Rankings of the potential (a) total, (b) damage, and (c) management costs in countries under current and future climatic conditions.

**
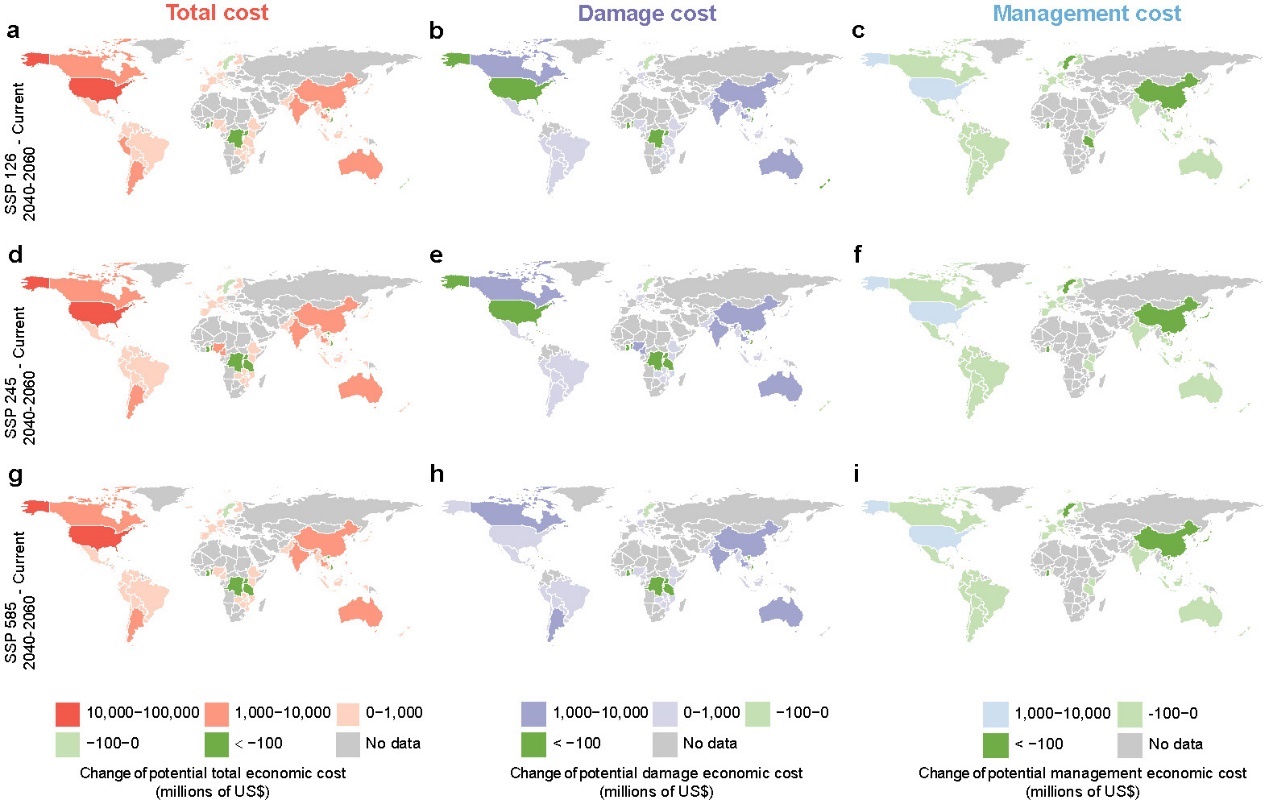
**

Supplementary Fig. 4 | Geographic distributions of the changes in the potential economic costs. On the basis of the framework shown in Fig. 1, the changes in the current and future potential economic costs were projected under (a-c) SSP 126, (d-f) SSP 245, and (g-i) SSP 585 scenarios.


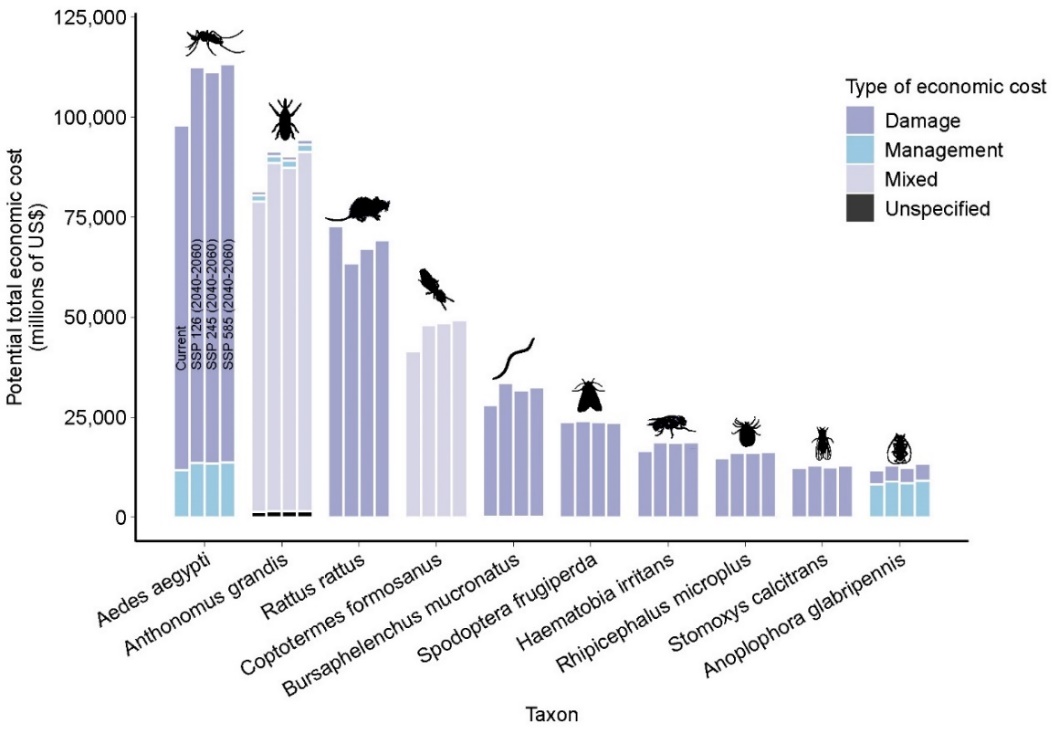


Supplementary Fig. 5 | Top 10 costliest invasive species under current and future climatic and socioeconomic scenarios. The four stacked bars for each species indicate the potential total economic costs under the current, SSP 126, SSP 245, and SSP 585 scenarios. Animal silhouettes were sourced from the PhyloPic database ([www.phylopic.org](http://www.phylopic.org)).


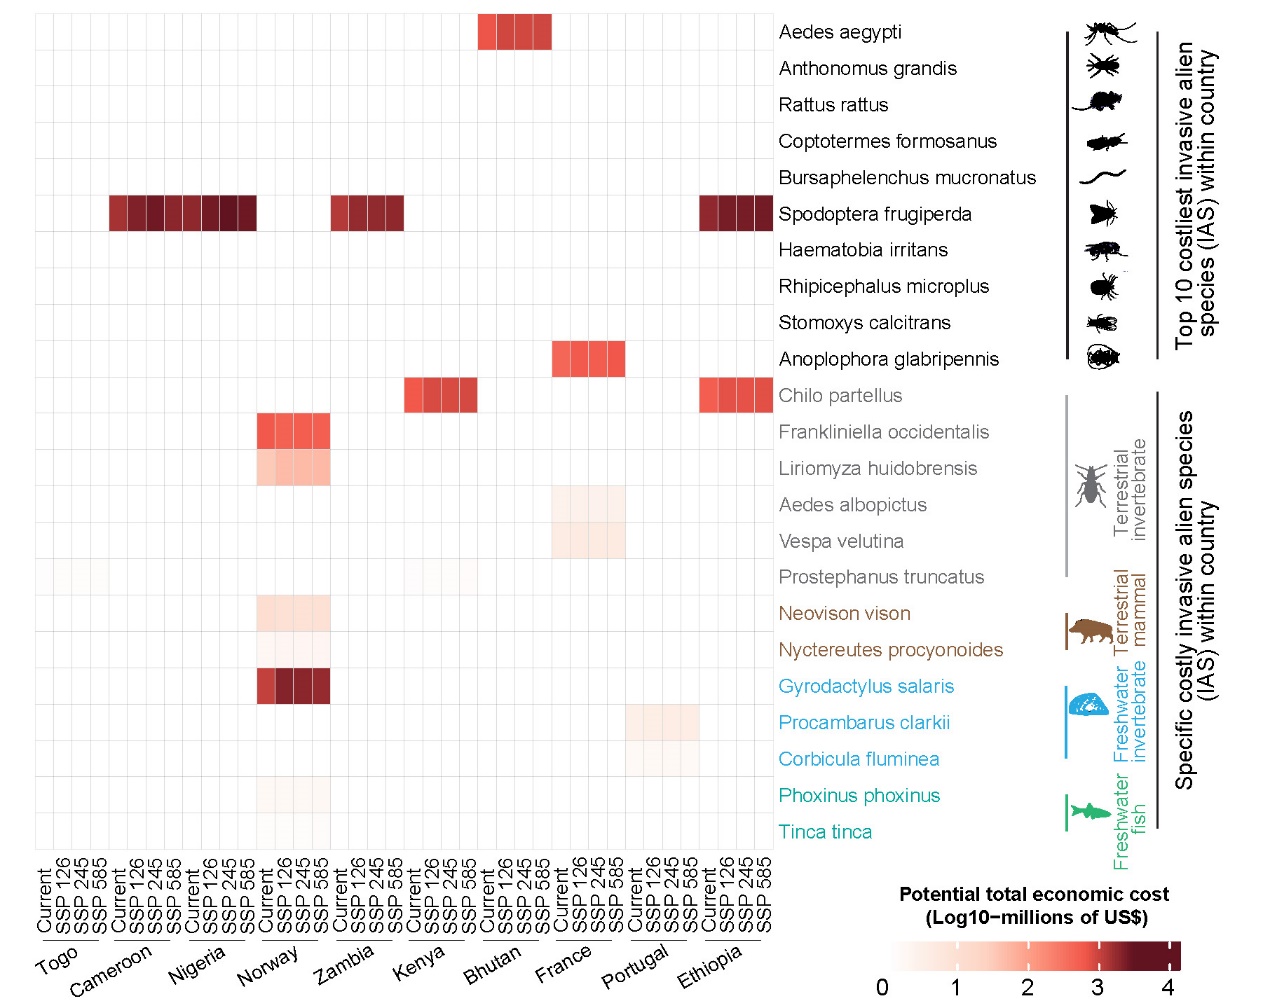


Supplementary Fig. 6 | The top 10 countries with the greatest increases of potential economic costs, the top 10 global costliest invaders, and the country-specific invaders under current and future climatic conditions. The squares filled with colors denote the potential economic costs of invasive animals, and darker colors indicate higher potential economic costs. Animal silhouettes were sourced from the PhyloPic database ([www.phylopic.org](http://www.phylopic.org)).


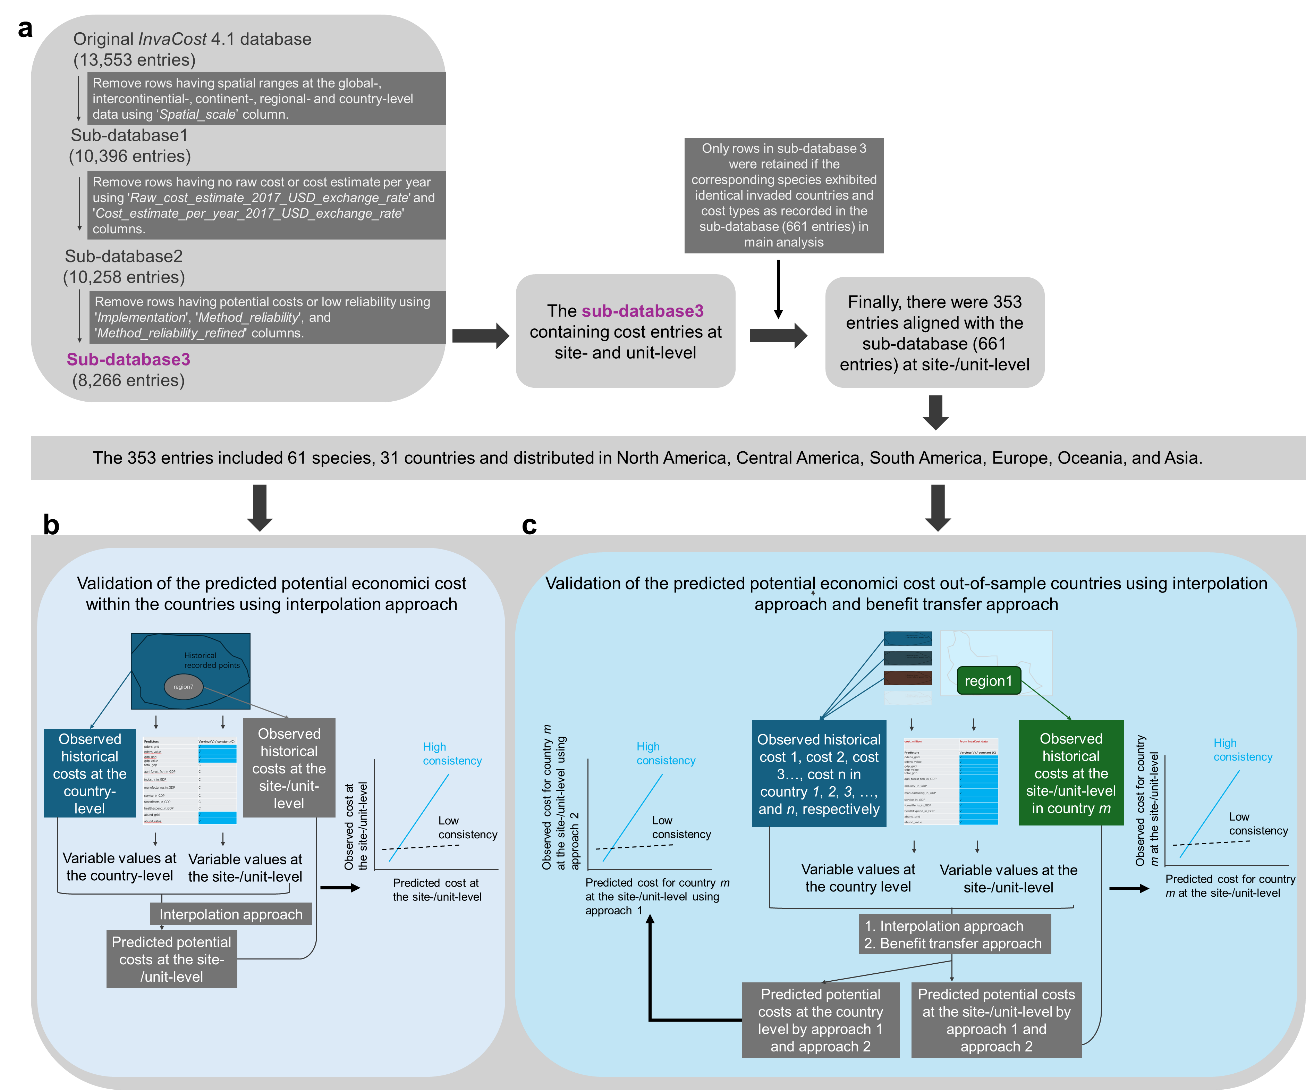


Supplementary Fig. 7 | Analysis flows for the validation of the predicted potential economic costs within the countries with observed economic costs in the main analysis and the out-of-sample countries without observed economic costs in the supplementary analysis (Supplementary Fig. 10). (a) filtering the original *InvaCost* 4.1 database to get the site-and unit-level datasets. (b) Testing the consistence of predicted and observed economic costs in different regions of the same country based on the interpolation approach. (c) Testing the consistence of predicted and observed economic costs in different regions of the out-of-sample countries based on the interpolation approach and benefit transfer approach. To evaluate potential economic costs of non-native species in out-of-sample countries, we focus on those non-native species that have established feral populations 2 according to the SInAS version 2.5 database 3,4, which was generated by applying the most comprehensive workflow and integrating up-to-date several large global databases of non-native species establishment 3. We had further filtered the database in the column ‘*degreeOfEstablishment*’ to remove only ‘casual’ and ‘absent’ rows and maintain the established status. We had also searched GISD, CABI, fishbase, Google Scholar, and other open sources that were not yet included in the database.


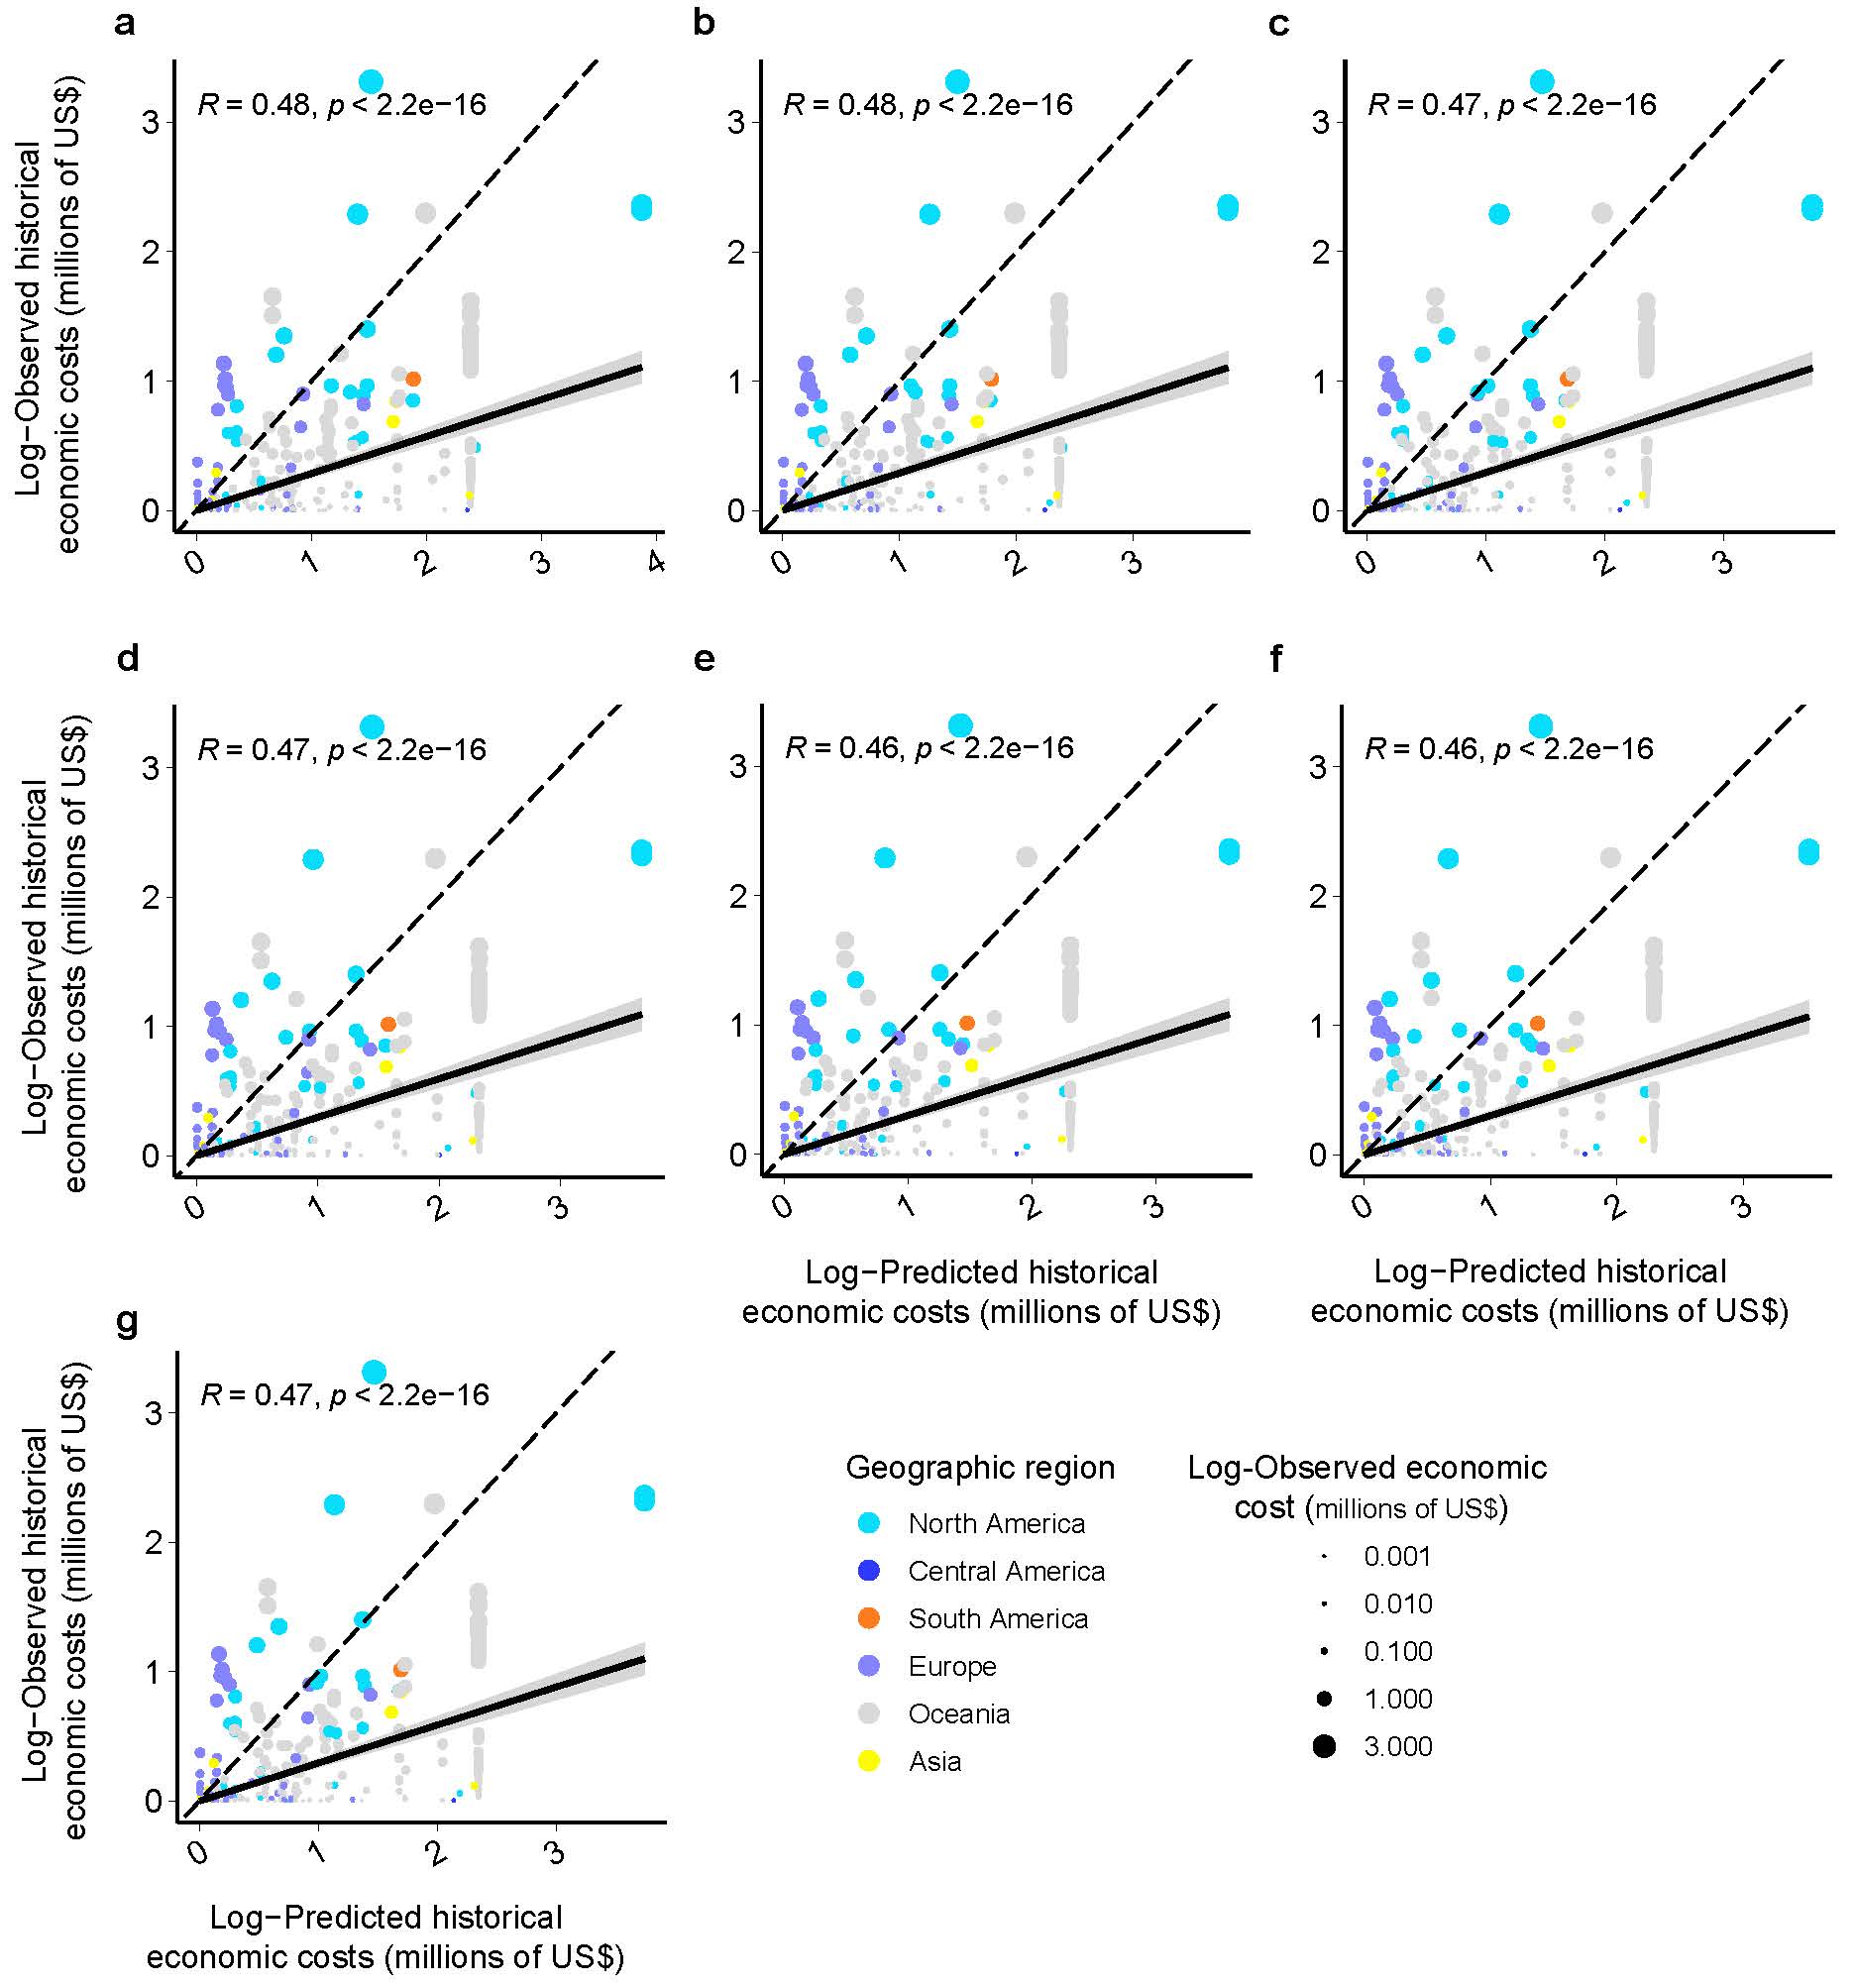


Supplementary Fig. 8 | Assessment of the predictive ability of interpolation approach within the country level by fitting predicted to observed historical economic costs. (a) to (f) were fittings of predicated to observed costs on the basis of different number of independent variables. All fittings in sub plot were exhibited significant predictive power. This indicated the interpolation approach had good predictive performance. (g) was the averages for the all modeling outputs. The black solid line was the regression line fitted based on linear model, and the gray shadow represented the 95% confidence interval of the regression line. The black regression line was closer to black dashed line, which indicated a better fitting.


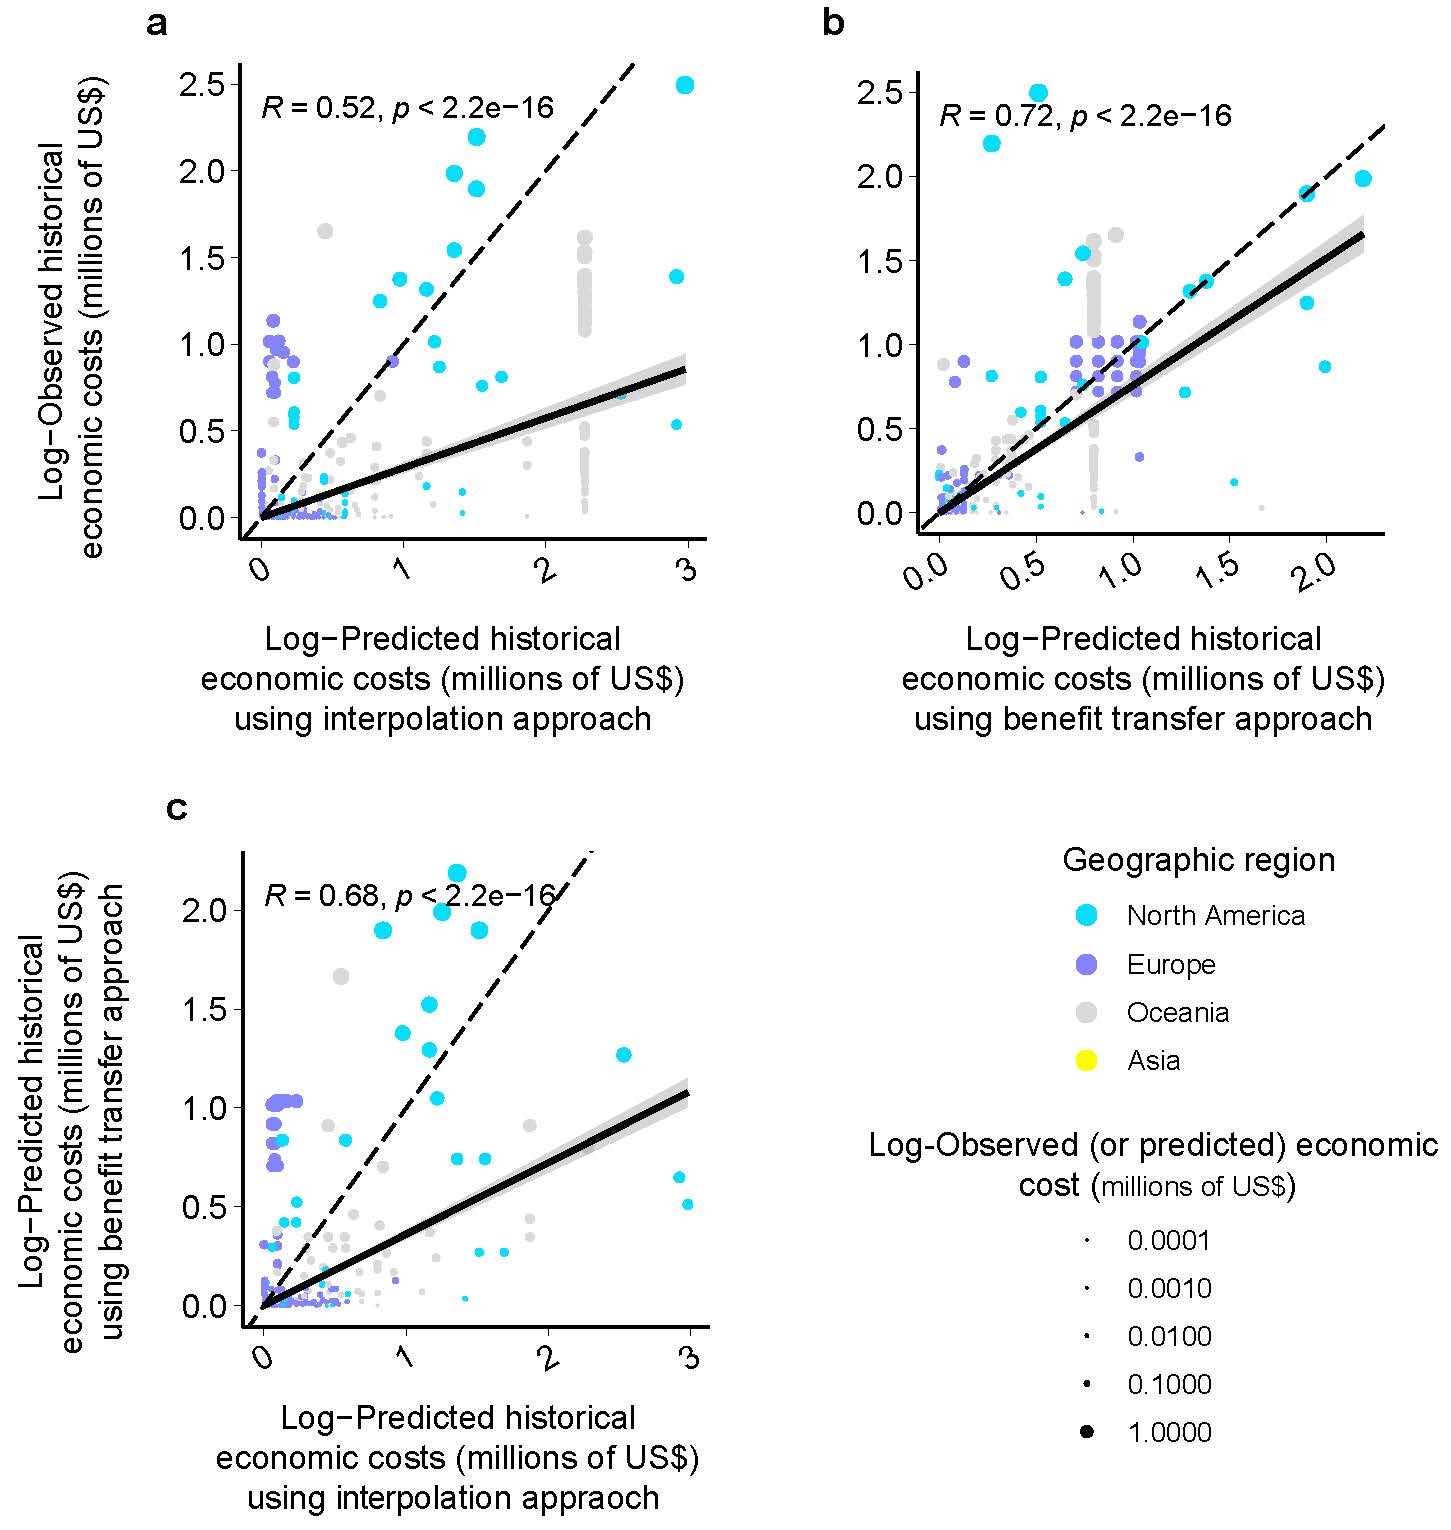


Supplementary Fig. 9 | Assessment of the predictive ability of interpolation approach and benefit transfer approach in out-of-sample countries by fitting predicted to observed historical economic costs. (a) and (b) were fittings predicated to observed costs on the basis of the interpolation and benefit transfer approaches, respectively. (c) was a fitting of predicated costs by interpolation and benefit transfer approaches. The black solid line was the regression line fitted based on linear model, and the gray shadow represented the 95% confidence interval of the regression line. The black regression line was closer to black dashed line, which indicated a better fitting.


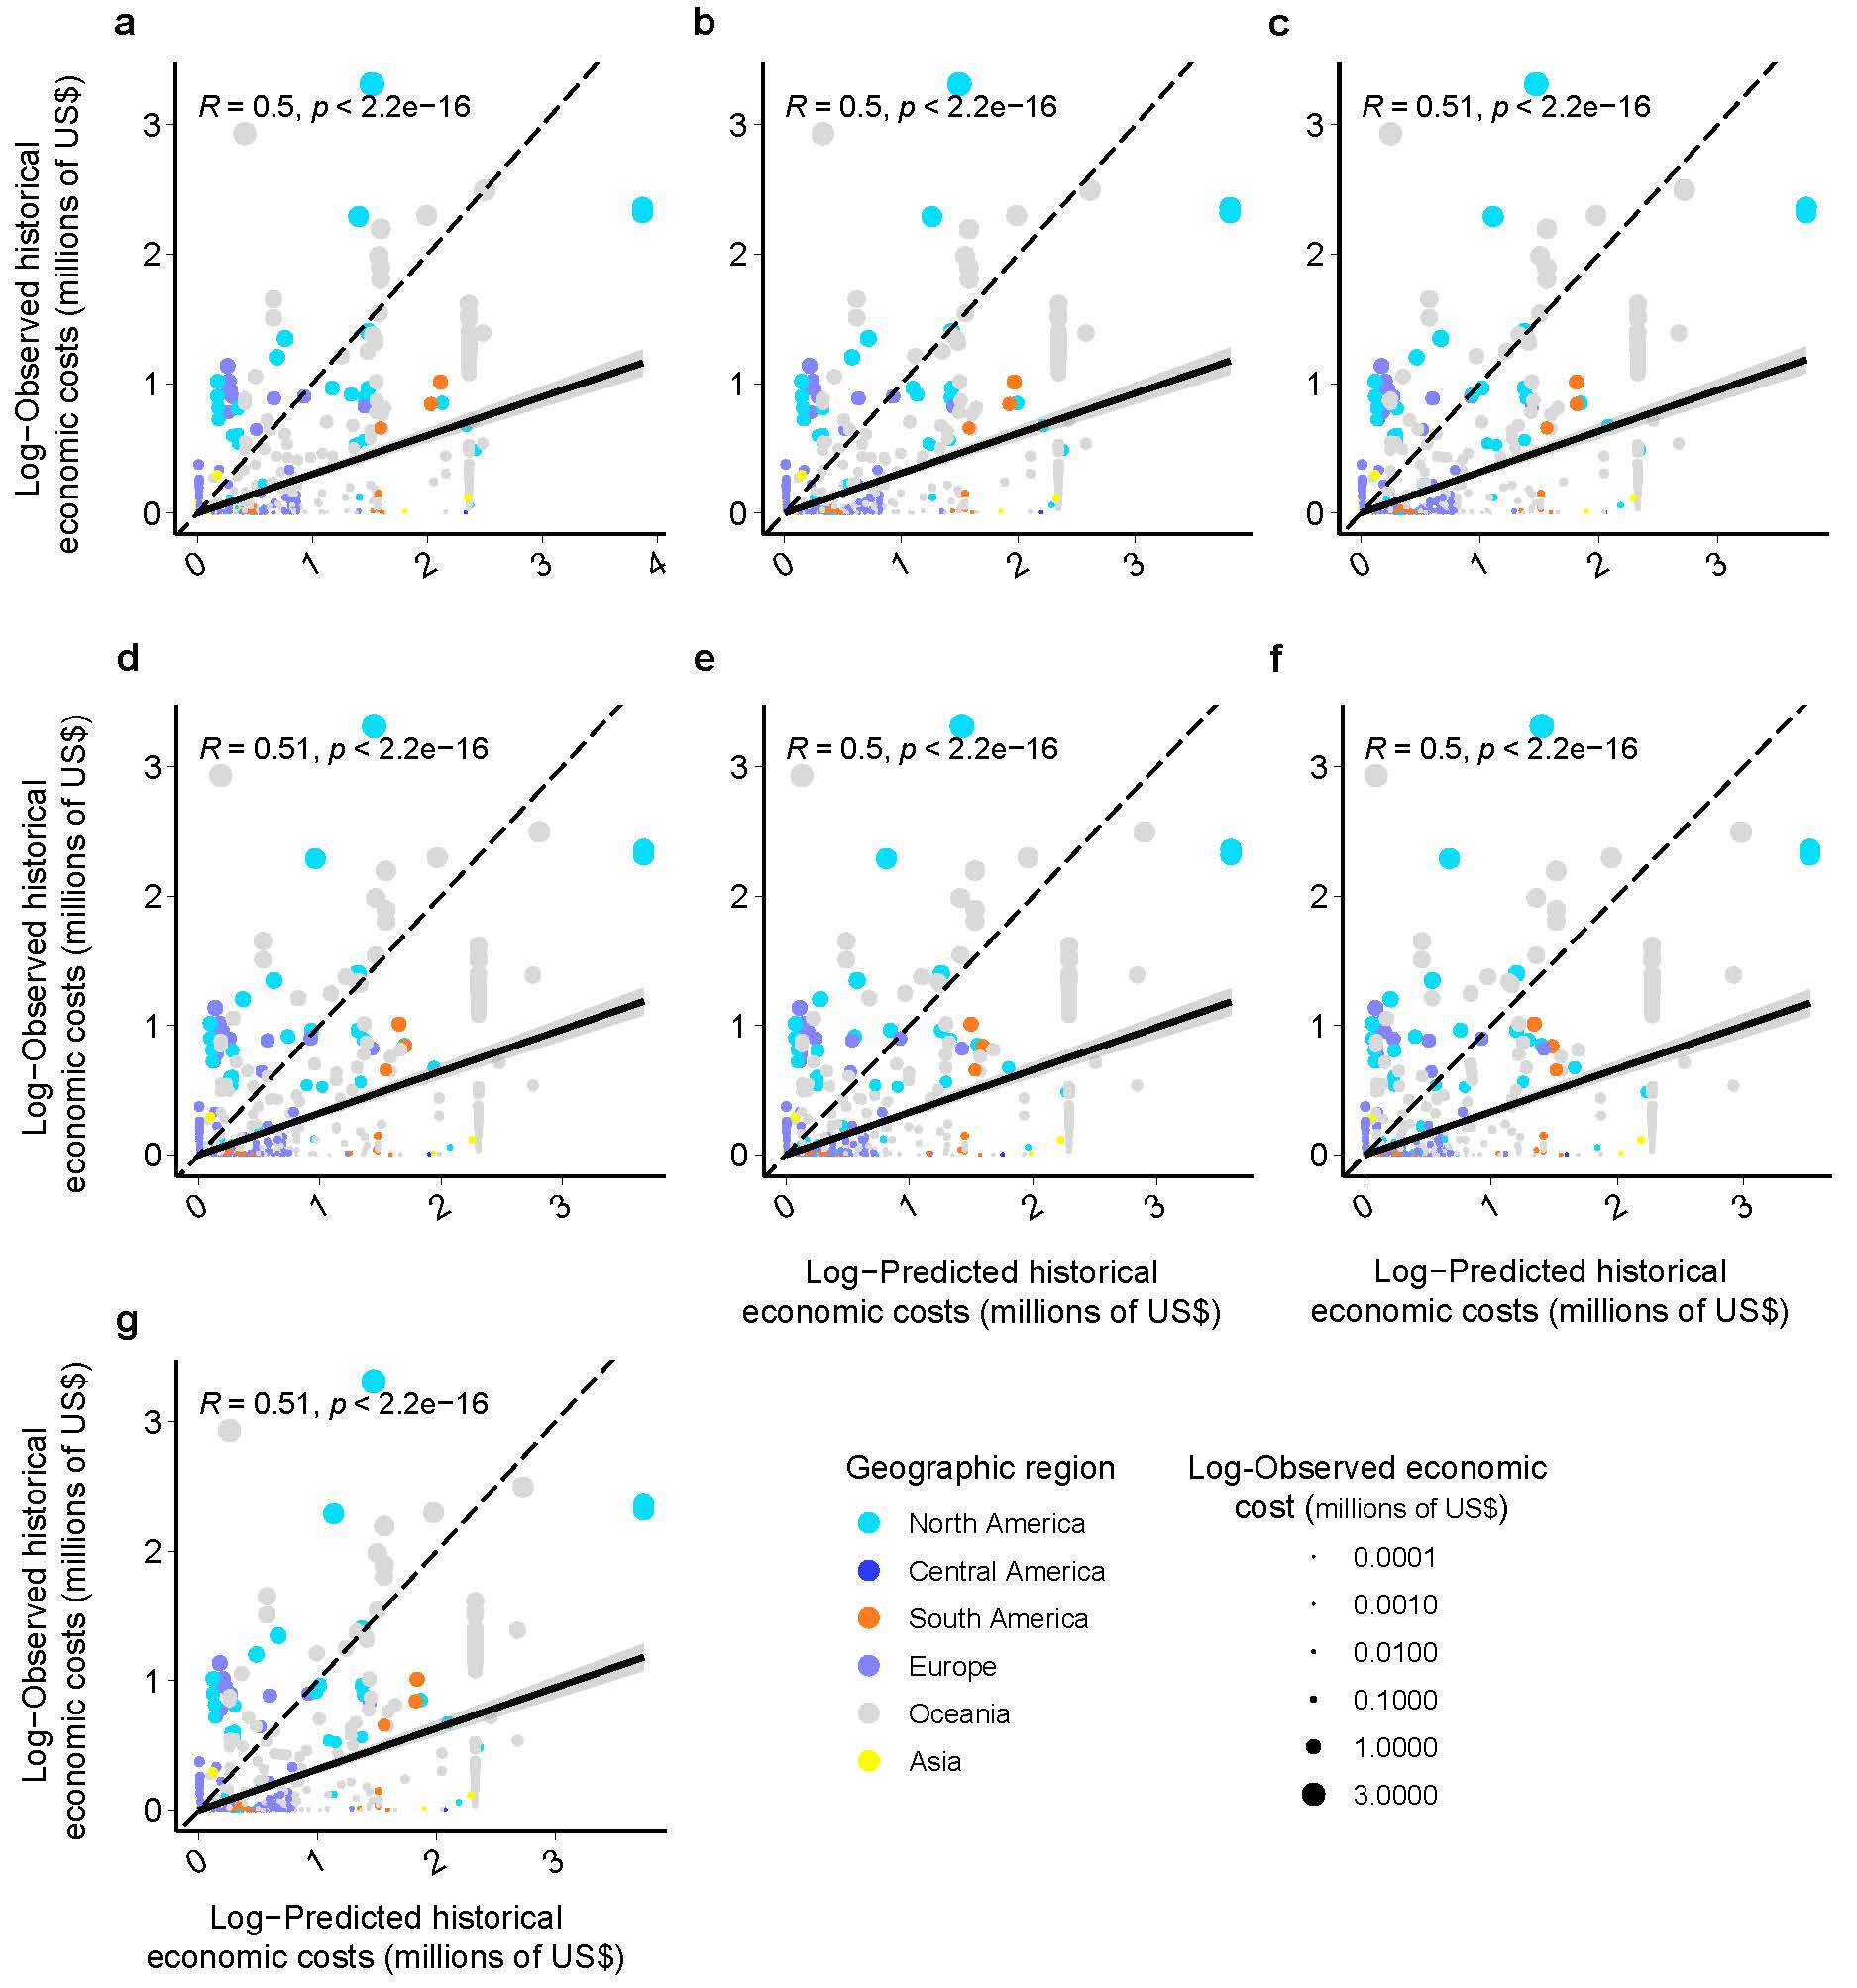


Supplementary Fig. 10 | Assessment of the predictive ability of interpolation approach in out-of-sample countries by fitting predicted to observed historical economic costs. (a) to (f) were fittings of predicated to observed costs on the basis of different number of independent variables. All fittings in sub plot were exhibited significant predictive power. This indicated the interpolation approach had good predictive performance. (g) was the averages for the all modeling outputs. The black solid line was the regression line fitted based on linear model, and the gray shadow represented the 95% confidence interval of the regression line. The black regression line was closer to black dashed line, which indicated a better fitting.

**
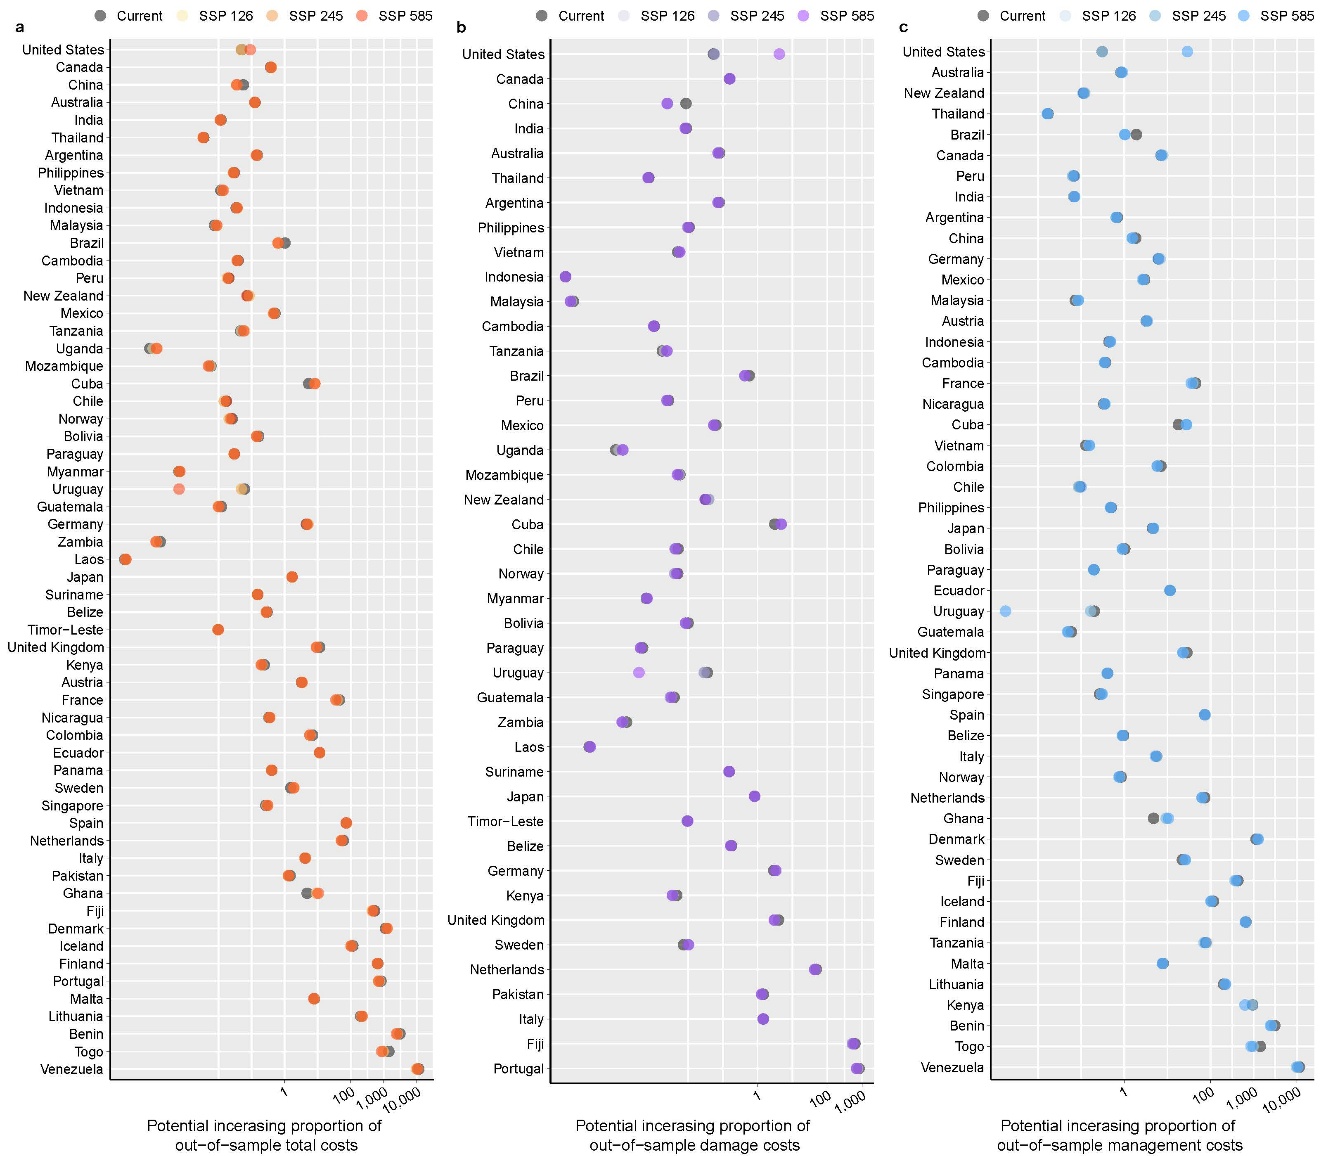
**

Supplementary Fig. 11 | Rankings of the potential increasing proportion of (a) total, (b) damage, and (c) management costs in out-of-sample countries under current and future climatic conditions. The rankings of countries is based on the potential economic costs predicted within countries. The Out-of-sample denote animal species in countries that have already been reported their establishments but have not been evaluated their economic costs. Then, these animal species and the interpolation approach (Supplementary Fig. 7) were used to predicted their extra potential economic costs. Corresponding to each country and cost type, we calculated ratios of potential out-of-sample costs to potential costs within counties, which was used to represent the increased proportion of potential costs (Supplementary Data 10).

**
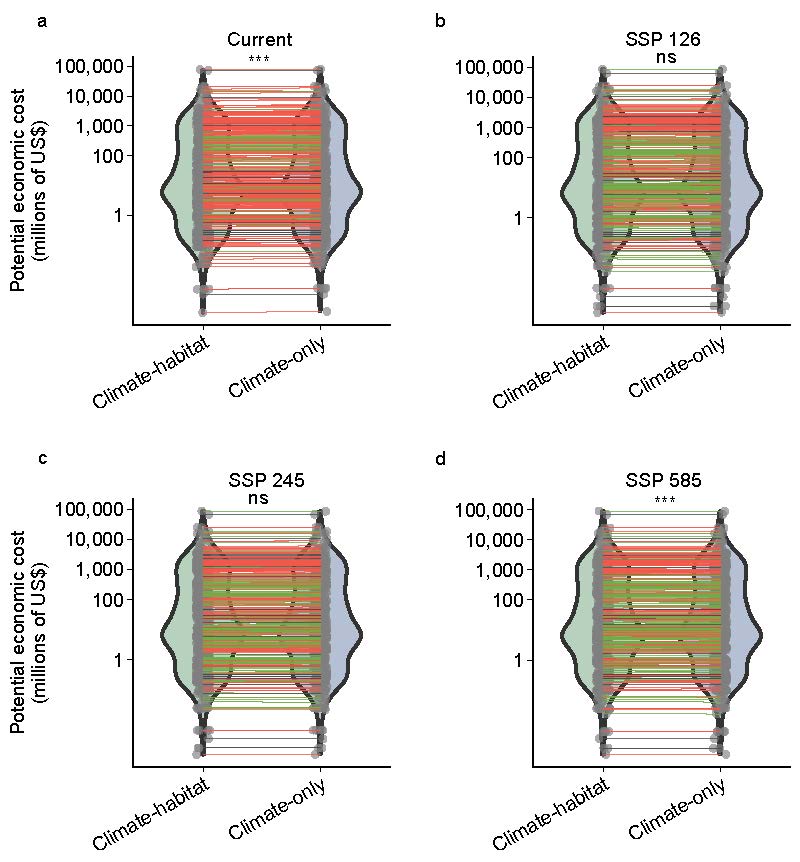
**

Supplementary Fig. 12 | Comparisons of the potential economic costs with and without filtering by habitats under current and future climate change conditions. The ‘Climate-habitat’ model denotes that the population distributions of non-native species were filtered by their reported adaptative habitat types. The ‘Climate-only’ model denotes that there were no filtration and considering the maximum occupied areas based on their climatic niches. The potential costs were predicted using climate-habitat model and climate-only model under (a) the current climatic and socioeconomic conditions and the (b) SSP 126, (c) SSP 245, (d) SSP 585 scenarios. In a–d, the red lines indicate an increase in the potential economic costs in the current and future under the various SSP scenarios; the green lines indicate decreasing trends; the gray lines indicate no changes. The differences of predicted costs on the basis of two models that were tested using the Wilcoxon paired test (**P* < 0.05, ***P* < 0.01, and ****P* < 0.001).


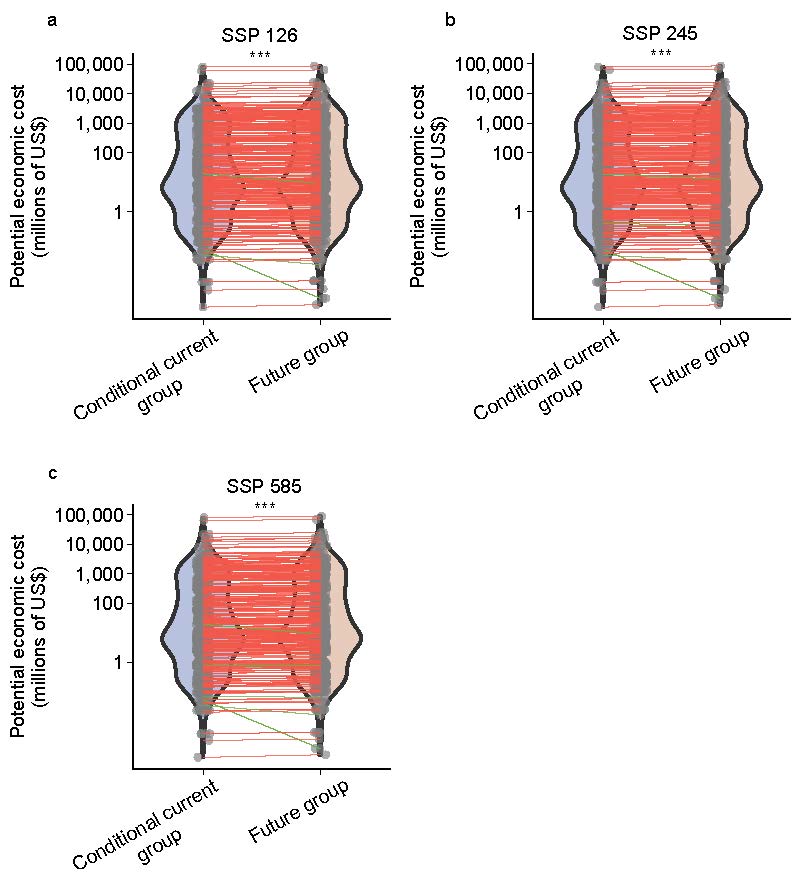


Supplementary Fig. 13 | Comparisons of the potential economic costs with and without GDP and human population density growth under future climate change conditions. The ‘Conditional current group’ denotes neither GDP nor human population density growth under the future climates and maintaining the current condition. The ‘Future group’ denotes both GDP and human population density growth as predictions under future climatic scenarios. The potential costs were predicted under (a) SSP 126, (b) SSP 245, (c) SSP 585 scenarios. In a–c, the red lines indicate an increase in the potential economic costs in the future under the various SSP scenarios; the green lines indicate decreasing trends; the gray lines indicate no changes. The differences of predicted costs on the basis of two models that were tested using the Wilcoxon paired test (**P* < 0.05, ***P* < 0.01, and ****P* < 0.001).


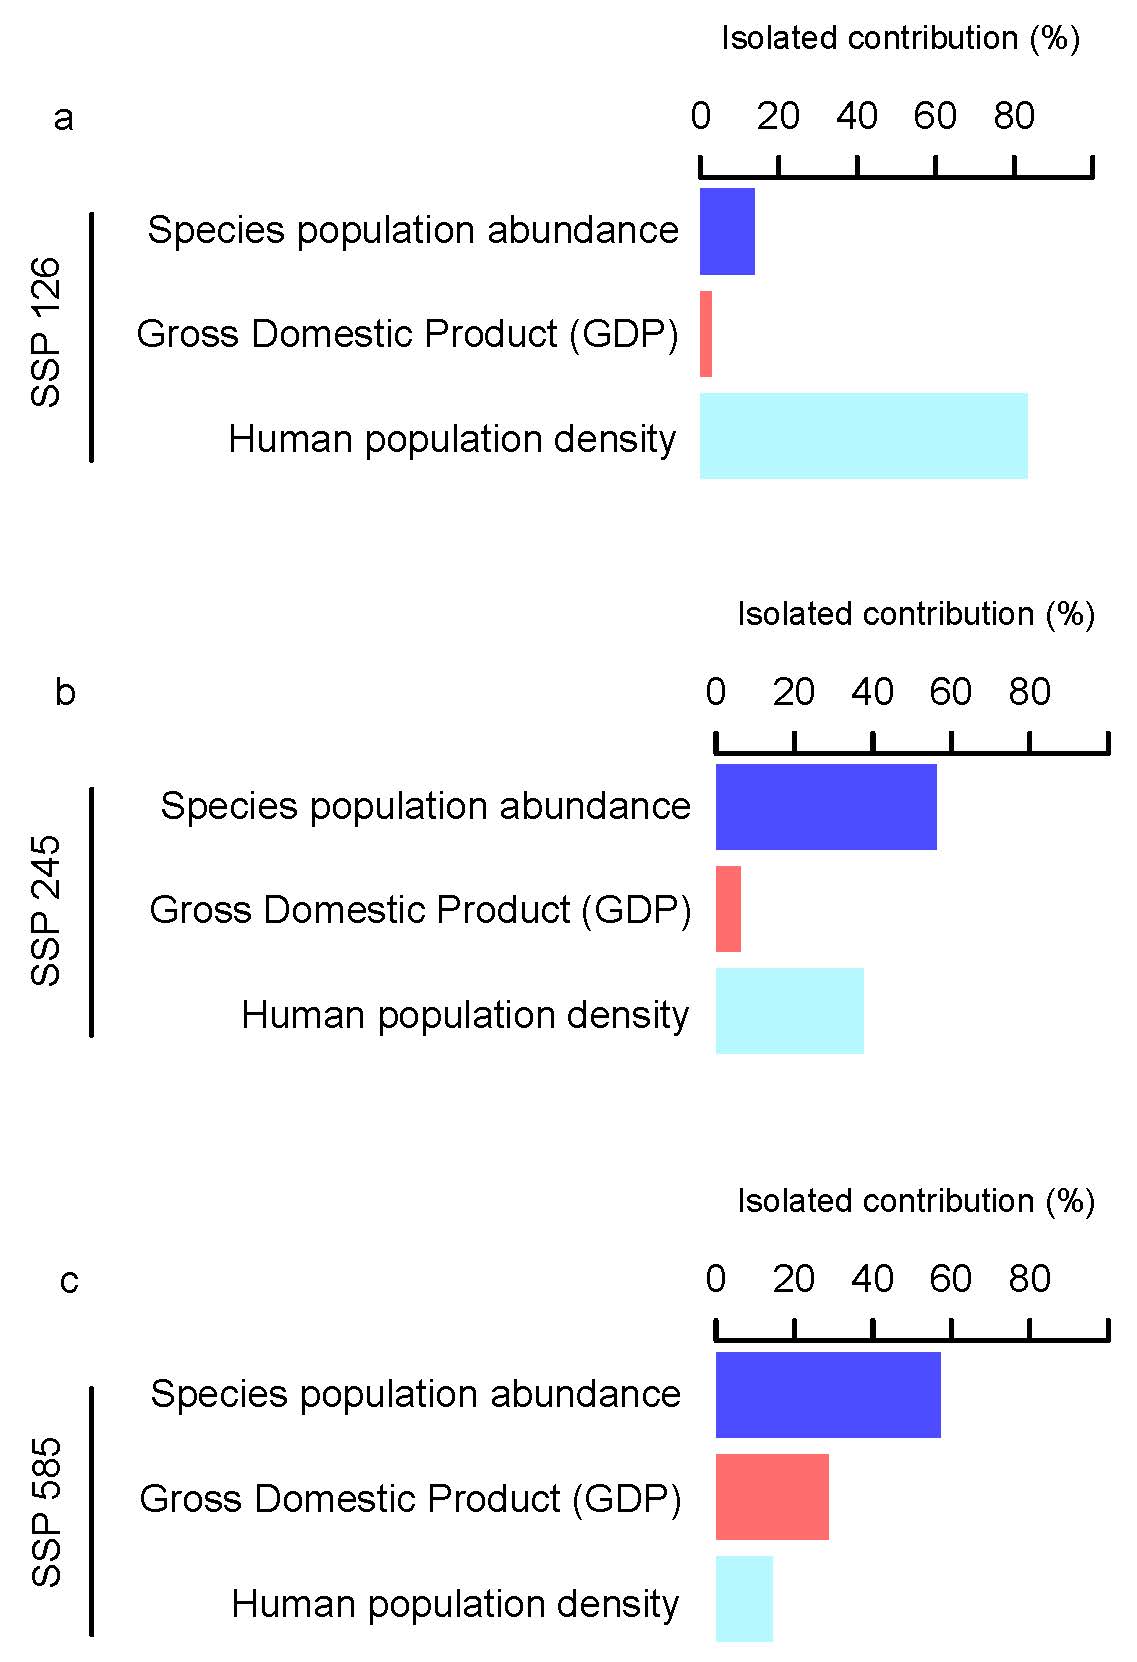


Supplementary Fig. 14 | Independent contribution of the changing habitat-filtered species population abundance, GDP and human population density to economic cost predictions.

Supplementary Table 1 | Basic assumptions for modeling predictions of current and future potential economic costs of invasive animals. The modeling steps consist with each part of component in the Framework in Fig. 1.

| **modeling steps** | **assumptions and references** |
| --- | --- |
| (a) Filter source data of non-native species' economic cost | We assume the retention of 129 invasive animal species can still live in the wilds and not been eliminated in the invaded counties before 2060. Because it is difficult and even unfeasible to completely eradicate non-native species once they are successfully invasion 5. |
| (b) Determine socioeconomic factors - quantify importance of impacted sector | We assume the average of importance (%) of sectors (e.g., agriculture, forestry, fishing, manufacturing, health expenditure, etc) in GDP in the year of 2000, 2010, and 2020 that can be used to represent the importance of impacted sector for the countries. It is because no assessable data showing the potential trends of future conditions of their importance 6. |
| (b) Determine socioeconomic factors - occupied grid number | We assume the gird with attribute values (e.g., GDP and human population density) above than zero that would be counted, which is better to represent the high probability of effects of socioeconomic factors on the invaders. |
| (b) Determine ecological factors - available habitat | We assume when species that have already adapted to specific habitat types, these species will still actively occupy these same habitats in the future. Because when species adapt and thrive in diverse environments through ecological niches and evolutionary strategies. It is commonly for species to long-term occupy adapted habitats over time 7,8. |
| (b) Determine ecological factors - species distribution modeling | We assume species currently occupies only a subset of its “realized” niche and will expand its range over time to occupy additional areas where the climate is suitable. Because climate change can open up portions of a species' fundamental niche that are currently inaccessible. Many species may expand their range to climatic suitability areas 9. |
| (b) Determine ecological factors - species distribution modeling | Due to the potential interactions with other species and disperses for some of species are less known in the future, we assume the potential distribution ranges and population abundance are highly necessary for assessing their potential economic costs. Because impact risks of non-native species can vary with their range size and abundance of invaded populations 10,11. |
| (c) Predictions of current and future potential economic costs within country | We assume management, infrastructure, cultural and legal conditions in a same country are much more similar than in different countries. There are indeed studies found governmental boundaries often align with cultural groups, making management, infrastructure, and legal conditions within the same country more cohesive compared to across different countries 12,13. |

Supplementary Table 2 | Difference and proportional changes of future to current potential total economic costs. The ‘SSP 126 – Current’, ‘SSP 245 – Current’, and ‘SSP 585 – Current’ in the heading were future (SSP 126, SSP 245, and SSP 585) minus current potential total economic costs, respectively. The proportional change was the minus value ratio to the current potential economic costs.

| **Continent** | **Country name** | **SSP 126 - Current | Prop. change**  **of SSP 126 to Current** | | | **SSP 245 - Current | Prop. change**  **of SSP 245 to Current** | **SSP 585 - Current | Prop. change of SSP 585 to Current** | | |
| --- | --- | --- | --- | --- | --- | --- | --- | --- |
| South America | Argentina | 1032.845 | 0.130 | | | 1027.404 | 0.129 | 1309.356 | 0.165 | | |
| Oceania | Australia | 3182.311 | 0.133 | | | 3074.566 | 0.129 | 3803.05 | 0.159 | | |
| Europe | Austria | 44.06 | 0.094 | | | 21.14 | 0.045 | 47.444 | 0.101 | | |
| Central America | Belize | 125.938 | 0.137 | | | 126.147 | 0.137 | 126.491 | 0.138 | | |
| Africa | Benin | -585.824 | -0.434 | | | -763.746 | -0.566 | -641.235 | -0.475 | | |
| Asia | Bhutan | 251.394 | 0.382 | | | 242.367 | 0.368 | 258.225 | 0.392 | | |
| South America | Bolivia | 421.02 | 0.256 | | | 419.684 | 0.256 | 437.56 | 0.266 | | |
| South America | Brazil | 962.733 | 0.195 | | | 870.984 | 0.177 | 907.723 | 0.184 | | |
| Asia | Brunei | 38.106 | 0.052 | | | 10.844 | 0.015 | 32.042 | 0.044 | | |
| Asia | Cambodia | 693.941 | 0.162 | | | 645.879 | 0.151 | 709.139 | 0.166 | | |
| Africa | Cameroon | 724.741 | 0.495 | | | 1151 | 0.787 | 487.878 | 0.334 | | |
| North America | Canada | 5613.758 | 0.116 | | | 4462.939 | 0.092 | 6046.652 | 0.125 | | |
| South America | Chile | 795.932 | 0.366 | | | 708.141 | 0.326 | 652.884 | 0.3 | | |
| Asia | China | 7100.73 | 0.194 | | | 5093.908 | 0.139 | 6194.407 | 0.169 | | |
| South America | Colombia | 43.322 | 0.145 | | | 41.794 | 0.14 | 47.456 | 0.159 | | |
| Central America | Cuba | -460.501 | -0.203 | | | -484.317 | -0.213 | -450.051 | -0.198 | | |
| Africa | Democratic Republic of the Congo | -716.582 | -0.228 | | | -793.432 | -0.253 | -475.346 | -0.151 | | |
| Europe | Denmark | 0.946 | 0.065 | | | 0.903 | 0.062 | 1.404 | 0.097 | | |
| South America | Ecuador | 35.719 | 0.157 | | | 35.002 | 0.154 | 38.354 | 0.169 | | |
| Africa | Ethiopia | 745.391 | 0.314 | | | 758.599 | 0.32 | 885.649 | 0.373 | | |
| Oceania | Fiji | 4.459 | 0.094 | | | 3.893 | 0.082 | 1.753 | 0.037 | | |
| Europe | Finland | 1.469 | 0.192 | | | 1.422 | 0.186 | 1.553 | 0.203 | | |
| Europe | France | 150.724 | 0.352 | | | 118.132 | 0.276 | 196.946 | 0.46 | | |
| Europe | Germany | 148.192 | 0.116 | | | 107.262 | 0.084 | 187.287 | 0.146 | | |
| Africa | Ghana | -754.358 | -0.411 | | | -783.679 | -0.427 | -893.944 | -0.487 | | |
| Central America | Guatemala | 335.873 | 0.231 | | | 328.723 | 0.226 | 345.486 | 0.237 | | |
| Europe | Iceland | 1.369 | 0.147 | | | 1.285 | 0.138 | 1.601 | 0.172 | | |
| Asia | India | 4936.392 | 0.229 | | | 4682.239 | 0.218 | 5191.918 | 0.241 | | |
| Asia | Indonesia | 524.749 | 0.091 | | | 367.356 | 0.064 | 559.04 | 0.097 | | |
| Europe | Italy | 8.632 | 0.092 | | | 7.22 | 0.077 | 15.135 | 0.161 | | |
| Asia | Japan | 72.281 | 0.063 | | | 50.717 | 0.044 | 67.686 | 0.059 | | |
| Africa | Kenya | 231.771 | 0.385 | | | 225.549 | 0.374 | 258.66 | 0.429 | | |
| Asia | Laos | 191.701 | 0.159 | | | 184.679 | 0.153 | 196.24 | 0.163 | | |
| Europe | Lithuania | 0.038 | 0.047 | | | 0.035 | 0.043 | 0.045 | 0.055 | | |
| Africa | Malawi | -10.63 | -0.004 | | | -45.92 | -0.018 | 55.554 | 0.021 | | |
| Asia | Malaysia | 719.073 | 0.145 | | | 669.163 | 0.135 | 758.939 | 0.153 | | |
| Europe | Malta | 0.121 | 0.116 | | | 0.113 | 0.108 | 0.139 | 0.133 | | |
| North America | Mexico | 929.635 | 0.257 | | | 882.769 | 0.244 | 923.677 | 0.255 | | |
| Africa | Mozambique | 193.825 | 0.078 | | | 349.828 | 0.14 | 549.633 | 0.22 | | |
| Asia | Myanmar | 315.262 | 0.202 | | | 274.864 | 0.176 | 328.533 | 0.211 | | |
| Europe | Netherlands | 23.305 | 0.243 | | | 22.96 | 0.239 | 24.773 | 0.258 | | |
| Oceania | New Zealand | -3.713 | -0.001 | | | 26.92 | 0.007 | 940.01 | 0.228 | | |
| Central America | Nicaragua | 35.174 | 0.095 | | | 33.455 | 0.09 | 37.659 | 0.102 | | |
| Africa | Nigeria | 670.618 | 0.359 | | | 1231.098 | 0.659 | 821.328 | 0.44 | | |
| Europe | Norway | 939.76 | 0.558 | | | 857.024 | 0.509 | 622.184 | 0.37 | | |
| Asia | Pakistan | 13.34 | 0.25 | | | 12.565 | 0.236 | 13.386 | 0.251 | | |
| Central America | Panama | 28.992 | 0.155 | | | 30.593 | 0.163 | 30.448 | 0.163 | | |
| South America | Paraguay | 303.065 | 0.186 | | | 289.892 | 0.178 | 321.657 | 0.198 | | |
| South America | Peru | 1014.574 | 0.239 | | | 975.351 | 0.23 | 985.408 | 0.232 | | |
| Asia | Philippines | 1168.422 | 0.159 | | | 1108.186 | 0.151 | 1254.994 | 0.171 | | |
| Europe | Portugal | 0.708 | 0.306 | | | 0.863 | 0.373 | 0.821 | 0.355 | | |
| Asia | Singapore | 371.736 | 0.14 | | | 378.206 | 0.142 | 434.734 | 0.164 | | |
| Europe | Spain | 11.85 | 0.086 | | | 9.189 | 0.067 | 14.367 | 0.104 | | |
| South America | Suriname | 109.732 | 0.116 | | | 111.275 | 0.117 | 118.518 | 0.125 | | |
| Europe | Sweden | -37.134 | -0.201 | | | -38.888 | -0.211 | -33.457 | -0.181 | | |
| Africa | Tanzania | 25.45 | 0.008 | | | -558.346 | -0.169 | -372.827 | -0.113 | | |
| Asia | Thailand | 1614.642 | 0.151 | | | 1547.296 | 0.145 | 1771.441 | 0.166 | | |
| Asia | Timor-Leste | 183.539 | 0.227 | | | 168.156 | 0.208 | 160.712 | 0.198 | | |
| Africa | Togo | 0.058 | 0.584 | | | 0.056 | 0.565 | 0.076 | 0.764 | | |
| Africa | Uganda | -153.214 | -0.052 | | | -821.75 | -0.28 | -766.671 | -0.261 | | |
| Europe | UK | 70.443 | 0.111 | | | 64.719 | 0.102 | 87.264 | 0.138 | | |
| South America | Uruguay | 187.007 | 0.127 | | | 144.652 | 0.098 | 189.432 | 0.129 | | |
| North America | USA | 12970.366 | 0.05 | | | 15453.93 | 0.06 | 23890.242 | 0.093 | | |
| South America | Venezuela | 0.004 | 0.213 | | | 0.005 | 0.274 | 0.004 | 0.214 | | |
| Asia | Vietnam | -175.465 | -0.028 | | | -237.652 | -0.038 | -200.656 | -0.032 | | |
| Africa | Zambia | 532.722 | 0.43 | | | 561.279 | 0.453 | 629.642 | 0.508 | | |
| Africa | Zimbabwe | 192.172 | 0.159 | | | 225.139 | 0.186 | 280.426 | 0.232 | | |
| **Number of studied countries** | | | 67 | 67 | | | 67 |
| **Percentage of countries with increasing costs (%)** | | | 86.567 | 86.567 | | | 88.060 |
| **Averaged percentage of increased costs (%)** | | | 19.556±12.595 | 19.734±15.444 | | | 21.011±13.048 |
| **Minimum percentage of increase (%)** | | | 0.769 | 0.652 | | | 2.138 |
| **Maximum percentage of increase (%)** | | | 58.408 | 78.688 | | | 76.411 |

Supplementary Table 3 | Difference comparison between future to current potential total, damage, and management economic costs of the countries. The Wilcoxon paired-test was used to compare the difference between country’s future (SSP 126, SSP 245, and SSP 585) and current potential economic costs, respectively. The *wilcox_test* function in *rstatix* (v.0.7.2) package 14 was used to conduct the Wilcoxon paired-test. ‘n’ was the number of paired countries; ‘*V*’ was the non-parametric statistical parameter; ‘*P*’ was the probability value describing the likely of significant difference between the future and current costs. There was significant difference when the ‘*P*’ value was less than 0.05.

| **Cost category** | **Future scenario**  **compared to current** | **Wilcoxon paired-test** | | |
| --- | --- | --- | --- | --- |
|  |  | **n** | ***V*** | ***P*** |
| Total cost | SSP 126 | 67 | 297 | 1.47E-07 |
| SSP 245 | 67 | 369 | 1.53E-06 |
| SSP 585 | 67 | 323 | 3.50E-07 |
| damage cost | SSP 126 | 53 | 254 | 4.48E-05 |
| SSP 245 | 53 | 320 | 4.71E-04 |
| SSP 585 | 53 | 225 | 1.44E-05 |
| management cost | SSP 126 | 50 | 119 | 5.72E-07 |
| SSP 245 | 50 | 138 | 1.46E-06 |
| SSP 585 | 50 | 125 | 7.71E-07 |

Supplementary Table 4 | Difference of invaders’ future to current potential total economic costs. The ‘SSP 126 – Current’, ‘SSP 245 – Current’, and ‘SSP 585 – Current’ in table heading were future (SSP 126, SSP 245, and SSP 585) minus current potential total economic costs, respectively.

| **Species scientific name** | **Country name** | **SSP 126 – Current** | **SSP 245 – Current** | **SSP 585 – Current** |
| --- | --- | --- | --- | --- |
| *Adelges piceae* | Canada | 1070.901 | 928.207 | 1067.873 |
| *Adelges tsugae* | United States | -2.473 | -3.187 | -2.721 |
| *Aedes aegypti* | Argentina | 212.172 | 202.643 | 211.771 |
| *Aedes aegypti* | Australia | 1.077 | 0.831 | 1.276 |
| *Aedes aegypti* | Belize | 125.938 | 126.147 | 126.491 |
| *Aedes aegypti* | Bhutan | 251.394 | 242.367 | 258.225 |
| *Aedes aegypti* | Bolivia | 421.02 | 419.684 | 437.56 |
| *Aedes aegypti* | Brazil | 962.736 | 871.064 | 907.459 |
| *Aedes aegypti* | Brunei | 38.106 | 10.844 | 32.042 |
| *Aedes aegypti* | Cambodia | 693.941 | 645.879 | 709.139 |
| *Aedes aegypti* | Canada | 74.103 | 64.756 | 90.618 |
| *Aedes aegypti* | Chile | 564.333 | 512.124 | 554.488 |
| *Aedes aegypti* | China | -188.608 | -210.622 | -147.105 |
| *Aedes aegypti* | Colombia | 43.322 | 41.794 | 47.456 |
| *Aedes aegypti* | Cuba | -453.996 | -477.446 | -443.805 |
| *Aedes aegypti* | Ecuador | 35.719 | 35.002 | 38.354 |
| *Aedes aegypti* | Guatemala | 335.873 | 328.723 | 345.486 |
| *Aedes aegypti* | India | 2873.731 | 2669.518 | 3013.81 |
| *Aedes aegypti* | Indonesia | 524.749 | 367.356 | 559.04 |
| *Aedes aegypti* | Laos | 191.701 | 184.679 | 196.24 |
| *Aedes aegypti* | Malaysia | 719.073 | 669.163 | 758.939 |
| *Aedes aegypti* | Mexico | 834.644 | 794.611 | 859.679 |
| *Aedes aegypti* | Myanmar | 315.262 | 274.864 | 328.533 |
| *Aedes aegypti* | Nicaragua | 35.174 | 33.455 | 37.659 |
| *Aedes aegypti* | Panama | 28.992 | 30.593 | 30.448 |
| *Aedes aegypti* | Paraguay | 303.065 | 289.892 | 321.657 |
| *Aedes aegypti* | Peru | 922.762 | 869.133 | 879.457 |
| *Aedes aegypti* | Philippines | 587.875 | 558.11 | 620.795 |
| *Aedes aegypti* | Singapore | 371.736 | 378.206 | 434.734 |
| *Aedes aegypti* | Suriname | 109.732 | 111.275 | 118.518 |
| *Aedes aegypti* | Thailand | 1614.642 | 1547.296 | 1771.441 |
| *Aedes aegypti* | Timor-Leste | 183.539 | 168.156 | 160.712 |
| *Aedes aegypti* | United States | 1853.607 | 1587.514 | 2110.045 |
| *Aedes aegypti* | Uruguay | 187.007 | 144.652 | 189.432 |
| *Aedes aegypti* | Vietnam | -175.465 | -237.652 | -200.656 |
| *Aedes albopictus* | France | 0.098 | 0.043 | 0.113 |
| *Aedes albopictus* | Italy | 0.065 | 0.026 | 0.063 |
| *Aedes albopictus* | Spain | 0.077 | 0.053 | 0.086 |
| *Aedes albopictus* | United States | 0.013 | -0.104 | 0.154 |
| *Aedes camptorhynchus* | New Zealand | 62.179 | 42.847 | 92.031 |
| *Agrilus planipennis* | Canada | 2.47 | 1.727 | 4.096 |
| *Agrilus planipennis* | United States | 56.778 | 38.648 | 59.573 |
| *Aleurodicus rugioperculatus* | India | 0 | 0 | 0 |
| *Alopochen aegyptiaca* | Netherlands | 0.211 | 0.208 | 0.222 |
| *Anastrepha fraterculus* | Argentina | 16.826 | 17.336 | 15.183 |
| *Anolis carolinensis* | Japan | -0.023 | -0.023 | -0.033 |
| *Anopheles darlingi* | Peru | 91.813 | 106.219 | 105.951 |
| *Anoplophora chinensis* | Italy | 6.404 | 5.306 | 11.701 |
| *Anoplophora glabripennis* | Austria | 44.06 | 21.14 | 47.444 |
| *Anoplophora glabripennis* | Canada | 774.233 | 429.47 | 1038.647 |
| *Anoplophora glabripennis* | France | 150.325 | 117.824 | 196.487 |
| *Anoplophora glabripennis* | Germany | 103.178 | 67.42 | 130.731 |
| *Anoplophora glabripennis* | United States | 140.189 | -88.688 | 284.8 |
| *Anthonomus grandis* | Argentina | 28.04 | 26.874 | 33.284 |
| *Anthonomus grandis* | United States | 9926.873 | 8787.676 | 12782.25 |
| *Arion lusitanicus* | Sweden | -35.256 | -36.757 | -31.846 |
| *Bactrocera philippinensis* | Australia | 307.214 | 296.304 | 54.391 |
| *Bactrocera tryoni* | Australia | -52.439 | -28.487 | -22.396 |
| *Bemisia tabaci* | United Kingdom | -1.19 | -1.19 | -1.19 |
| *Boiga irregularis* | United States | 0.428 | 0.371 | 0.46 |
| *Branta canadensis* | United Kingdom | 0.209 | 0.343 | 0.529 |
| *Bruchus pisorum* | China | 5.382 | 4.824 | 5.693 |
| *Bursaphelenchus mucronatus* | China | 5551.714 | 3663.608 | 4490.78 |
| *Bursaphelenchus mucronatus* | Japan | 0.81 | -0.352 | 0.042 |
| *Bursaphelenchus mucronatus* | Sweden | 0.083 | -0.136 | 0.094 |
| *Cactoblastis cactorum* | Mexico | 94.943 | 88.115 | 63.915 |
| *Callosciurus erythraeus* | Japan | 0.223 | 0.195 | 0.209 |
| *Camelus dromedarius* | Australia | 3.256 | 2.211 | 6.771 |
| *Cameraria ohridella* | Germany | 3.462 | 3.043 | 3.977 |
| *Canis lupus* | Australia | 171.963 | 249.41 | 206.416 |
| *Canis lupus* | United States | 603.187 | 597.741 | 596.155 |
| *Capra hircus* | Australia | 27.69 | 22.929 | 28.07 |
| *Capra hircus* | New Zealand | 1.007 | 0.945 | 2.847 |
| *Castor canadensis* | Chile | 0.364 | 0.375 | 0.019 |
| *Ceratitis capitata* | Argentina | 45.366 | 47.301 | 48.36 |
| *Ceutorhynchus obstrictus* | Canada | 276.307 | 262.885 | 309.46 |
| *Chelydra serpentina* | Japan | 0.005 | 0 | 0.005 |
| *Chilo partellus* | Ethiopia | 195.554 | 179.349 | 210.37 |
| *Chilo partellus* | Kenya | 231.733 | 225.523 | 258.546 |
| *Chilo partellus* | Malawi | 208.462 | 182.285 | 225.321 |
| *Chilo partellus* | Tanzania | 258.427 | 240.227 | 277.421 |
| *Cochliomyia hominivorax* | Australia | 1340.841 | 1413.256 | 2006.724 |
| *Coptotermes formosanus* | United States | 6694.364 | 7130.952 | 7921.816 |
| *Coptotermes gestroi* | Fiji | 4.459 | 3.893 | 1.753 |
| *Corbicula fluminea* | Portugal | 0.159 | 0.152 | 0.051 |
| *Cydia pomonella* | China | 1620.713 | 1681.958 | 1882.795 |
| *Cygnus olor* | United Kingdom | 0.089 | 0.082 | 0.109 |
| *Daktulosphaira vitifoliae* | Australia | 0.423 | 0.447 | 0.377 |
| *Daktulosphaira vitifoliae* | China | 0.962 | 0.62 | 1.019 |
| *Dendroctonus micans* | United Kingdom | 0.34 | 0.337 | 0.389 |
| *Dreissena polymorpha* | United Kingdom | 1.528 | 1.55 | 2.016 |
| *Dreissena polymorpha* | United States | 1041.106 | 930.993 | 1197.809 |
| *Drosophila suzukii* | United States | 10.107 | 5.729 | 10.099 |
| *Elatobium abietinum* | United Kingdom | 3.713 | 3.258 | 4.428 |
| *Ephestia kuehniella* | Germany | -5.265 | -7.336 | -3.825 |
| *Equus caballus* | Australia | 0.158 | 0.162 | 0.194 |
| *Felis catus* | Australia | 1064.338 | 828.98 | 1171.05 |
| *Felis catus* | Spain | 0.045 | 0.037 | 0.059 |
| *Frankliniella occidentalis* | Norway | -114.244 | -61.483 | -84.237 |
| *Globodera rostochiensis* | Japan | -0.896 | -0.984 | -0.186 |
| *Gyrodactylus salaris* | Norway | 1039.841 | 904.148 | 689.351 |
| *Haematobia irritans* | Canada | 2125.7 | 1913.324 | 2033.841 |
| *Halotydeus destructor* | Australia | 77.915 | 72.026 | 91.645 |
| *Hemitragus jemlahicus* | New Zealand | 0.35 | 0.429 | 1.007 |
| *Herpestes javanicus* | Japan | 0.404 | 0.366 | 0.341 |
| *Hyblaea puera* | Mexico | 0.027 | 0.023 | 0.021 |
| *Hypera postica* | United States | 198.401 | 296.712 | 396.026 |
| *Hyphantria cunea* | China | 1.569 | 1.327 | 1.648 |
| *Hypothenemus hampei* | India | 14.941 | 11.413 | 15.584 |
| *Leptinotarsa decemlineata* | China | 10.37 | 9.084 | 10.405 |
| *Leptinotarsa decemlineata* | Finland | 1.469 | 1.422 | 1.553 |
| *Leptinotarsa decemlineata* | United Kingdom | 6.457 | 6.5 | 6.22 |
| *Limnoperna fortunei* | Argentina | 2.602 | 2.395 | 2.731 |
| *Limnoperna fortunei* | Brazil | -0.003 | -0.08 | 0.264 |
| *Linepithema humile* | Japan | -0.09 | -0.318 | -0.331 |
| *Linepithema humile* | New Zealand | -0.12 | 0.037 | 0.395 |
| *Liriomyza huidobrensis* | Norway | 15.645 | 16.223 | 18.392 |
| *Liriomyza sativae* | China | 136.873 | 10.295 | -11.022 |
| *Lissachatina fulica* | Cuba | -6.504 | -6.871 | -6.245 |
| *Listronotus bonariensis* | New Zealand | -7.08 | 23.069 | 383.393 |
| *Lithobates catesbeianus* | United Kingdom | -0.063 | -0.07 | -0.05 |
| *Lymantria dispar* | Canada | 505.438 | 465.606 | 568.936 |
| *Lymantria dispar* | New Zealand | -99.659 | -124.626 | 87.482 |
| *Lymantria dispar* | United States | 383.763 | 334.475 | 429.591 |
| *Maconellicoccus hirsutus* | Mexico | 0.016 | 0.015 | 0.017 |
| *Muntiacus reevesi* | Japan | 0.126 | 0.082 | 0.151 |
| *Mus musculus* | Australia | 3.595 | 2.093 | 3.357 |
| *Mustela erminea* | New Zealand | 0.608 | 0.566 | 2.041 |
| *Myiopsitta monachus* | United Kingdom | 0.264 | 0.265 | 0.346 |
| *Myiopsitta monachus* | United States | 0.109 | 0.043 | 0.058 |
| *Myocastor coypus* | Italy | 1.834 | 1.611 | 2.904 |
| *Myocastor coypus* | Japan | 0.368 | -0.472 | -0.025 |
| *Neovison vison* | Chile | 4.316 | 4.311 | 4.749 |
| *Neovison vison* | Denmark | 0.82 | 0.79 | 1.226 |
| *Neovison vison* | Germany | 3.106 | 3.168 | 3.42 |
| *Neovison vison* | Iceland | 1.369 | 1.285 | 1.601 |
| *Neovison vison* | Norway | -1.704 | -2.055 | -1.589 |
| *Neovison vison* | Spain | 10.733 | 8.211 | 13.053 |
| *Neovison vison* | Sweden | -1.668 | -1.695 | -1.442 |
| *Neovison vison* | United Kingdom | 0.13 | 0.125 | 0.163 |
| *Nilaparvata lugens* | Japan | 53.088 | 44.754 | 54.996 |
| *Nyctereutes procyonoides* | Denmark | 0.126 | 0.113 | 0.178 |
| *Nyctereutes procyonoides* | Lithuania | 0.038 | 0.035 | 0.045 |
| *Nyctereutes procyonoides* | Norway | 0.103 | 0.106 | 0.126 |
| *Nyctereutes procyonoides* | Sweden | -0.293 | -0.3 | -0.262 |
| *Ondatra zibethicus* | Germany | 42.361 | 39.701 | 51.175 |
| *Ondatra zibethicus* | Netherlands | 11.604 | 11.058 | 12.043 |
| *Ondatra zibethicus* | United Kingdom | 5 | 4.495 | 5.533 |
| *Oryctolagus cuniculus* | Australia | 130.523 | 117.911 | 126.914 |
| *Oryctolagus cuniculus* | Germany | 1.089 | 1.033 | 1.45 |
| *Oryctolagus cuniculus* | United Kingdom | 39.924 | 36.813 | 50.252 |
| *Oxyura jamaicensis* | United Kingdom | 1.643 | 1.653 | 2.101 |
| *Pacifastacus leniusculus* | Japan | 0.724 | 0.762 | 0.737 |
| *Pacifastacus leniusculus* | United Kingdom | 0.878 | 0.798 | 1.091 |
| *Paguma larvata* | Japan | 10.847 | 8.675 | 8.849 |
| *Paracoccus marginatus* | India | 223.933 | 231.073 | 214.487 |
| *Pectinophora gossypiella* | United States | 12.129 | 15.432 | 21.157 |
| *Petromyzon marinus* | Canada | 245.196 | 257.045 | 271.842 |
| *Petromyzon marinus* | United States | 7.298 | 7.067 | 8.56 |
| *Phascolarctos cinereus* | Australia | 0.048 | 0.044 | 0.055 |
| *Phasianus colchicus* | Germany | 0.262 | 0.232 | 0.359 |
| *Phenacoccus solenopsis* | India | 1823.787 | 1770.234 | 1948.036 |
| *Phoxinus phoxinus* | Norway | 0.087 | 0.061 | 0.105 |
| *Phthorimaea operculella* | China | 21.825 | 10.792 | 20.095 |
| *Pomacea canaliculata* | Philippines | 580.547 | 550.077 | 634.2 |
| *Procambarus clarkii* | Italy | 0.33 | 0.277 | 0.466 |
| *Procambarus clarkii* | Portugal | 0.549 | 0.71 | 0.77 |
| *Procyon lotor* | Japan | 6.255 | 5.268 | 3.897 |
| *Prostephanus truncatus* | Benin | 0.056 | 0.053 | 0.069 |
| *Prostephanus truncatus* | Kenya | 0.039 | 0.026 | 0.114 |
| *Prostephanus truncatus* | Togo | 0.058 | 0.056 | 0.076 |
| *Pseudorasbora parva* | United Kingdom | 0.789 | 0.728 | 0.754 |
| *Psittacula krameri* | Netherlands | 11.491 | 11.694 | 12.508 |
| *Psittacula krameri* | Pakistan | 13.34 | 12.565 | 13.386 |
| *Psittacula krameri* | United Kingdom | 0.045 | 0.044 | 0.052 |
| *Raoiella indica* | Mexico | 0.005 | 0.004 | 0.046 |
| *Rattus exulans* | New Zealand | -0.06 | -0.375 | 0.391 |
| *Rattus norvegicus* | Malta | 0.121 | 0.113 | 0.139 |
| *Rattus norvegicus* | United Kingdom | 8.084 | 7.371 | 10.62 |
| *Rattus rattus* | Australia | 0.608 | 0.457 | 0.473 |
| *Rattus rattus* | United States | -9301.77 | -5654.87 | -3480.72 |
| *Rhinella marina* | Australia | 1.028 | -0.725 | 0.781 |
| *Rhipicephalus microplus* | United States | 1336.919 | 1449.262 | 1523.879 |
| *Rhynchophorus ferrugineus* | Spain | 0.994 | 0.888 | 1.168 |
| *Scirtothrips perseae* | United States | 9.338 | 18.161 | 31.251 |
| *Sciurus carolinensis* | United Kingdom | 3.974 | 3.631 | 5.011 |
| *Sirex noctilio* | Argentina | 1.206 | 2.316 | 2.022 |
| *Sirex noctilio* | Australia | 22.494 | 15.234 | 16.668 |
| *Solenopsis invicta* | Australia | 3.165 | 2.777 | 4.395 |
| *Solenopsis invicta* | China | -60.071 | -77.977 | -59.901 |
| *Solenopsis invicta* | Japan | 0.173 | -7.435 | -1.325 |
| *Spodoptera frugiperda* | Benin | -585.88 | -763.799 | -641.304 |
| *Spodoptera frugiperda* | Cameroon | 724.741 | 1151 | 487.878 |
| *Spodoptera frugiperda* | Democratic Republic of the Congo | -716.582 | -793.432 | -475.346 |
| *Spodoptera frugiperda* | Ethiopia | 549.837 | 579.25 | 675.279 |
| *Spodoptera frugiperda* | Ghana | -754.358 | -783.679 | -893.944 |
| *Spodoptera frugiperda* | Malawi | -219.092 | -228.204 | -169.767 |
| *Spodoptera frugiperda* | Mozambique | 193.825 | 349.828 | 549.633 |
| *Spodoptera frugiperda* | Nigeria | 670.618 | 1231.098 | 821.328 |
| *Spodoptera frugiperda* | Tanzania | -232.944 | -798.949 | -650.511 |
| *Spodoptera frugiperda* | Uganda | -153.214 | -821.75 | -766.671 |
| *Spodoptera frugiperda* | Zambia | 532.722 | 561.279 | 629.642 |
| *Spodoptera frugiperda* | Zimbabwe | 192.172 | 225.139 | 280.426 |
| *Stomoxys calcitrans* | Canada | 539.411 | 139.92 | 661.339 |
| *Sus scrofa* | Argentina | 726.634 | 728.538 | 996.005 |
| *Sus scrofa* | Australia | 7.856 | 9.96 | 26.079 |
| *Sus scrofa* | Chile | 268.016 | 218.618 | 134.726 |
| *Teia anartoides* | New Zealand | 0.242 | 48.402 | 225.779 |
| *Thrips palmi* | United Kingdom | -1.37 | -2.014 | -1.112 |
| *Tinca tinca* | Norway | 0.032 | 0.024 | 0.036 |
| *Trachemys scripta* | Japan | 0.064 | 0.044 | 0.08 |
| *Trichosurus vulpecula* | New Zealand | 38.665 | 35.481 | 144.013 |
| *Trogoderma granarium* | Tanzania | -0.033 | 0.376 | 0.264 |
| *Varroa jacobsoni* | New Zealand | 0 | 0 | 0 |
| *Vespa velutina* | France | 0.301 | 0.265 | 0.347 |
| *Vespa velutina* | Japan | 0.205 | 0.153 | 0.279 |
| *Vespula germanica* | Chile | -41.098 | -27.287 | -41.098 |
| *Vespula vulgaris* | New Zealand | 0.155 | 0.146 | 0.631 |
| *Vulpes vulpes* | Australia | 70.558 | 68.745 | 79.81 |
| *Xenopus laevis* | Venezuela | 0.004 | 0.005 | 0.004 |
| **Number of samples** | | 220 | 220 | 220 |
| **Percentage of samples with increase costs (%)** | | 0.85 | 0.832 | 0.864 |

Supplementary Table 5 | Summary of terrestrial invertebrates, mammals, and other taxa in impacting the types of sectors.

| **Category of human health and Public & social welfare sectors (yes/no/unknown)** | **Terrestrial invertebrates and mammals impacted sectors** | **Number of samples** | **Number of types of impacted sectors** | **Category of human health and Public & social welfare sectors (yes/no/unknown)** | **other taxa impacted sectors** | **Number of samples** | **Number of types of impacted sectors** |
| --- | --- | --- | --- | --- | --- | --- | --- |
| no | Authorities-Stakeholders | 202 | 1 | no | Authorities-Stakeholders | 42 | 1 |
| no | Agriculture | 191 | 1 | no | Agriculture | 10 | 1 |
| yes | Authorities-Stakeholders/Health/Public and social welfare | 50 | 3 | no | Environment/Fishery | 2 | 2 |
| no | Authorities-Stakeholders/Health | 36 | 2 | no | Fishery | 2 | 1 |
| yes | Public and social welfare | 29 | 1 | no | Authorities-Stakeholders/Fishery | 1 | 2 |
| yes | Health | 27 | 1 | yes | Authorities-Stakeholders/Public and social welfare | 1 | 2 |
| no | Forestry | 18 | 1 | yes | Public and social welfare | 1 | 1 |
| no | Environment | 12 | 1 | unknown | Unspecified | 1 |  |
| yes | Agriculture/Public and social welfare | 9 | 2 |  |  |  |  |
| yes | Authorities-Stakeholders/Public and social welfare | 7 | 2 |  |  |  |  |
| yes | Health/Public and social welfare | 5 | 2 |  |  |  |  |
| no | Agriculture/Authorities-Stakeholders | 3 | 2 |  |  |  |  |
| unknown | Unspecified | 3 |  |  |  |  |  |
| no | Agriculture/Environment | 2 | 2 |  |  |  |  |
| yes | Agriculture/Environment/Health/Public and social welfare | 2 | 4 |  |  |  |  |
| no | Agriculture/Forestry | 1 | 2 |  |  |  |  |
| no | Authorities-Stakeholders/Environment | 1 | 2 |  |  |  |  |
| no | Authorities-Stakeholders/Forestry | 1 | 2 |  |  |  |  |
| yes | Environment/Fishery/Public and social welfare | 1 | 3 |  |  |  |  |
| no | Fishery | 1 | 1 |  |  |  |  |
| **Total number of samples** | | 601 |  |  |  | 60 |  |
| **Percentages of samples related to human health and Public & social welfare sectors** | | 130 (21.6%) |  |  |  | 2 (3.3%) |  |
| **Average of number of types** | | | 1.842 |  |  |  | 1.429 |
| **Standard deviation of number of types** | | | 0.83421 |  |  |  | 0.535 |

Supplementary Table 6 | Bioclimatic variables for estimating species potential distributions.

| **Taxonomic group** | **number of predictors** | **Details of variables used to estimate species potential distributions** | **References** |
| --- | --- | --- | --- |
| Amphibians and reptiles | 8 | annual average temperature, temperature seasonality, maximum temperature of the warmest month, minimum temperature of the coldest month, annual precipitation, precipitation seasonality, precipitation of the wettest quarter, and precipitation of the driest quarter | Araújo MB, Nogués-Bravo D, Diniz-Filho JAF, Haywood AM, Valdes PJ, Rahbek C. Quaternary climate changes explain diversity among reptiles and amphibians. Ecography 2008, 31(1): 8-15. |
| Birds | 6 | temperature seasonality, maximum temperature of the warmest month, minimum temperature of the coldest month, precipitation of the wettest month, precipitation of the driest month, and precipitation seasonality | (1) Barbet-Massin M, Jetz W. The effect of range changes on the functional turnover, structure and diversity of bird assemblages under future climate scenarios. Global Change Biology 2015, 21(8): 2917-2928. (2) Ferger SW, Schleuning M, Hemp A, Howell KM, Bohning-Gaese K. Food resources and vegetation structure mediate climatic effects on species richness of birds. Global Ecology and Biogeography 2014, 23(5): 541-549. (3) Thuiller W, Pironon S, Psomas A, Barbet-Massin M, Jiguet F, Lavergne S, et al. The European functional tree of bird life in the face of global change. Nature Communications 2014, 5: 3118. |
| Mammals | 10 | annual average temperature, mean temperature of the wettest quarter, mean temperature of the driest quarter, mean temperature of the warmest quarter, mean temperature of the coldest quarter, annual precipitation, precipitation of the wettest quarter, precipitation of the driest quarter, precipitation of the warmest quarter, and precipitation of the coldest quarter | (1) Li Y, Li X, Sandel B, Blank D, Liu Z, Liu X, et al. Climate and topography explain range sizes of terrestrial vertebrates. Nature Climate Change 2015, 6(5): 498-502. (2) Visconti P, Bakkenes M, Baisero D, Brooks T, Butchart SHM, Joppa L, et al. Projecting global biodiversity indicators under future development scenarios. Conservation Letters 2016, 9(1): 5-13. |
| Terrestrial invertebrates | 6 | mean diurnal range, maximum temperature of the warmest month, minimum temperature of the coldest month, annual precipitation, precipitation of the wettest month, and precipitation of the driest month | (1) Hill MP, Gallardo B, Terblanche JS. A global assessment of climatic niche shifts and human influence in insect invasions. Global Ecology and Biogeography 2017, 26(6): 679-689.  (2) Fournier A, Penone C, Pennino MG, Courchamp F. Predicting future invaders and future invasions. Proceedings of the National Academy of Sciences of the United States of America 2019, 116(16): 7905-7910. |
| Freshwater fishes | 8 | mean diurnal range, temperature seasonality, maximum temperature of the warmest month, precipitation of the wettest month, precipitation of the driest month, precipitation seasonality, precipitation of the warmest quarter, and precipitation of the coldest quarter | Kärcher O, Frank K, Walz A, Markovic D. Scale effects on the performance of niche-based models of freshwater fish distributions. Ecological Modelling 2019, 405: 33-42. |
| Freshwater invertebrates | 4 | maximum temperature of the warmest month, minimum temperature of the coldest month, precipitation of the wettest quarter, and precipitation of the driest quarter | Zhang ZX, Kass JM, Mammola S, Koizumi I, Li XC, Tanaka K, et al. Lineage-level distribution models lead to more realistic climate change predictions for a threatened crayfish. Diversity and Distributions 2021, 27(4): 684-695. |

Supplementary Table 7 | Difference comparison between future to current potential economic costs of taxa. The Wilcoxon paired-test was used to compare the difference between future (SSP 126, SSP 245, and SSP 585) and current potential economic costs of the taxonomic group, respectively. The *wilcox_test* function in *rstatix* (v.0.7.2) package 14 was used to conduct the Wilcoxon paired-test. ‘n’ was the number of paired countries; ‘*V*’ was the non-parametric statistical parameter; ‘*P*’ was the probability value describing the likely of significant difference between the future and current costs. There was significant difference when the ‘*P*’ value was less than 0.05.

| **Costs of taxonomic group** | **Future scenario**  **compared to current** | **Wilcoxon paired-test** | | |
| --- | --- | --- | --- | --- |
|  |  | **n** | ***V*** | ***P*** |
| All taxa | SSP 126 | 661 | 29325 | 9.36E-60 |
|  | SSP 245 | 661 | 37040 | 3.99E-49 |
|  | SSP 585 | 661 | 28960 | 2.77E-60 |
| Terrestrial invertebrates | SSP 126 | 327 | 9754 | 2.03E-23 |
|  | SSP 245 | 327 | 11164 | 5.84E-20 |
|  | SSP 585 | 327 | 9517 | 4.99E-24 |
| Terrestrial mammals | SSP 126 | 274 | 892 | 1.51E-42 |
|  | SSP 245 | 274 | 1964 | 8.12E-38 |
|  | SSP 585 | 274 | 1115 | 1.54E-41 |
| Freshwater invertebrates | SSP 126 | 23 | 1 | 3.26E-05 |
|  | SSP 245 | 23 | 2 | 3.72E-05 |
|  | SSP 585 | 23 | 0 | 2.85E-05 |
| Birds | SSP 126 | 16 | 0 | 4.72E-04 |
|  | SSP 245 | 16 | 0 | 4.72E-04 |
|  | SSP 585 | 16 | 0 | 4.72E-04 |
| Amphibians | SSP 126 | 6 | 2 | 8.45E-02 |
|  | SSP 245 | 6 | 20 | 5.23E-02 |
|  | SSP 585 | 6 | 2 | 8.45E-02 |
| Reptiles | SSP 126 | 11 | 19 | 2.21E-01 |
|  | SSP 245 | 11 | 19 | 2.21E-01 |
|  | SSP 585 | 11 | 19 | 2.21E-01 |
| Freshwater fishes | SSP 126 | 4 | 0 | 9.75E-02 |
|  | SSP 245 | 4 | 0 | 9.75E-02 |
|  | SSP 585 | 4 | 0 | 9.75E-02 |

Supplementary Data 1: Rankings of predicted current and future potential economic costs in descending order at the species level.

Supplementary Data 2: The number of grids occupied by the population distribution of animal species in invaded countries under current and future climatic scenarios.

Supplementary Data 3: The utilization of various habitats by different animal species groups.

Supplementary Data 4: The first reported time of part of animal species in their invaded countries.

Supplementary Data 5: Selected sub-datasets on the basis of filtering steps showing in Supplementary Fig. 1

Supplementary Data 6: Database and literature sources of determining geographical coordinates for the animal species.

Supplementary Data 7: Population abundance data for the animal species.

Supplementary Data 8: Entry’s ID in *InvaCost* v4.1 database, species name, taxonomic classification, and country name in final sub-dataset using data analyses.

Supplementary Data 9: Goodness of fit for abundance-based SDMs and these recorded sixteen failed predictions.

Supplementary Data 10: Predicted potential out-of-sample economic costs in countries under current and future climatic conditions.

Supplementary References

1. Diagne, C. *et al.* InvaCost, a public database of the economic costs of biological invasions worldwide. *Scientific Data* **7**, 277 (2020). <https://doi.org:10.1038/s41597-020-00586-z>

2. Henry, M. *et al.* Unveiling the hidden economic toll of biological invasions in the European Union. *Environmental Sciences Europe* **35**, 43 (2023). <https://doi.org:10.1186/s12302-023-00750-3>

3. Seebens, H. *et al.* A workflow for standardising and integrating alien species distribution data. *NeoBiota* **59** (2020). <https://doi.org:10.3897/neobiota.59.53578>

4. Seebens, H. SInAS database of regional alien species checklists (2.5) [Data set]. Zenodo. <https://doi.org/10.5281/zenodo.10038256>. (2023).

5. García-Díaz, P. *et al.* Management Policies for Invasive Alien Species: Addressing the Impacts Rather than the Species. *BioScience* **71**, 174-185 (2020). <https://doi.org:10.1093/biosci/biaa139>

6. Foerster, A. T., Hornstein, A., Sarte, P.-D. G. & Watson, M. W. Aggregate Implications of Changing Sectoral Trends. *Journal of Political Economy* **130**, 3286-3333 (2022). <https://doi.org:10.1086/720763>

7. Hanson, J. O. *et al.* Global conservation of species’ niches. *Nature* **580**, 232-234 (2020). <https://doi.org:10.1038/s41586-020-2138-7>

8. Troia MJ, e. a. Species traits and reduced habitat suitability limit efficacy of climate change refugia in streams. *Nature Ecology & Evolution* (2019).

9. Chevalier, M., Broennimann, O. & Guisan, A. Climate change may reveal currently unavailable parts of species’ ecological niches. *Nature Ecology & Evolution* (2024). <https://doi.org:10.1038/s41559-024-02426-4>

10. Strayer, D. L. Non-native species have multiple abundance–impact curves. *Ecology and Evolution* **10**, 6833-6843 (2020). <https://doi.org:https://doi.org/10.1002/ece3.6364>

11. Wang, S., Li, W., Zhang, J., Luo, Z. & Li, Y. Alien range size, habitat breadth, origin location, and domestication of alien species matter to their impact risks. *Integrative Zoology* **00**, 1-15 (2024). <https://doi.org:https://doi.org/10.1111/1749-4877.12837>

12. Braun, T. in *Compliance Norms in Financial Institutions: Measures, Case Studies and Best Practices* (ed Tomasz Braun) 257-284 (Springer International Publishing, 2019).

13. Peterson, M. F. & Søndergaard, M. Countries, Within-Country Regions, and Multiple-Country Regions in International Management: A Functional, Institutional, and Critical Event (FICE) Perspective. *Management International Review* **54**, 781-800 (2014). <https://doi.org:10.1007/s11575-014-0228-1>

14. Kassambara, A. rstatix: Pipe-Friendly Framework for Basic Statistical Tests. R package version 0.7.2. (2023). <https://doi.org:https://rpkgs.datanovia.com/rstatix/>
